# Supplementary material for: Overcoming uncollapsed haplotypes in long-read assemblies of non-model organisms
Source: PubMed Central journal article supplement (PMC8178825; doi:10.1186/s12859-021-04118-3), 2021-06-05
Supplement: 12859_2021_4118_MOESM1_ESM.pdf [file 12859_2021_4118_MOESM1_ESM.pdf]

## Supplementary data

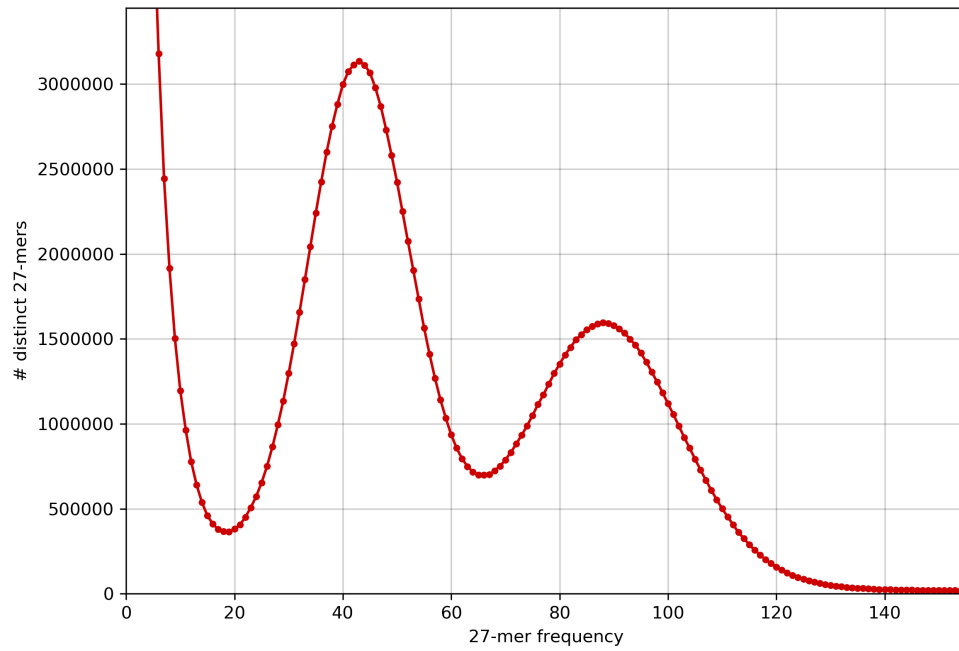

**Figure S1.** *k*-mer spectrum of *Adineta vaga* using Illumina reads and KAT v2.4.2. The first peak corresponds to heterozygous *k*-mers (around 45X) and the second peak corresponds to homozygous *k*-mers.

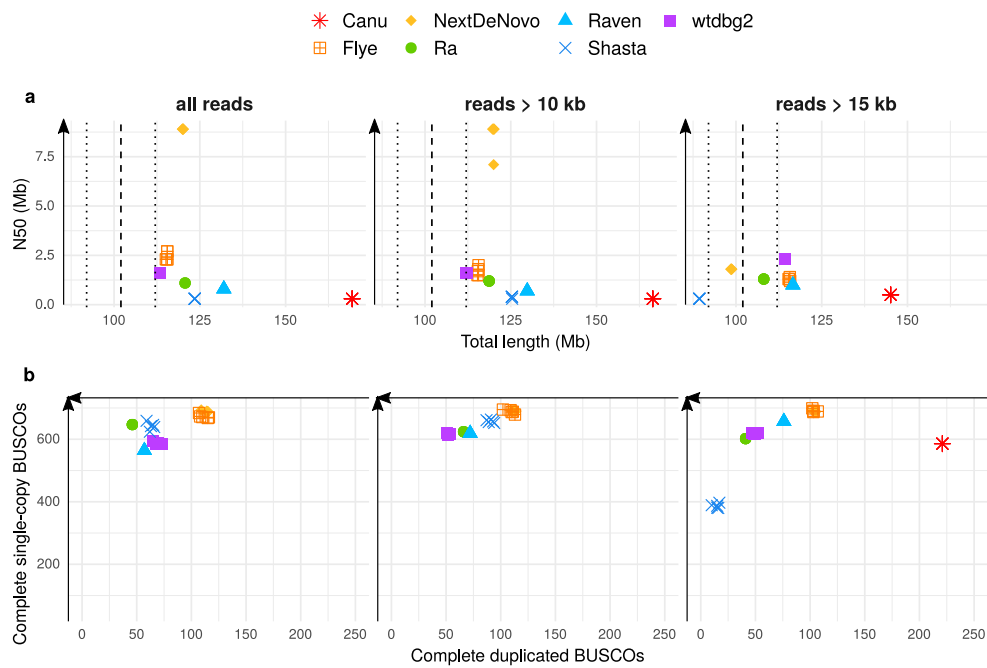

**Figure S2.** Statistics of PacBio assemblies obtained from the full PacBio dataset or with a read-filtering step prior to assembly based on read length exclusively, using different thresholds: 10 kb, 15 kb. All assemblies were run five times to assess the reproducibility of the output produced by each assembler. a) N50 plotted against total assembly length. The dashed line indicates the expected genome size, with a +/- 10 Mb margin delimited by the dotted lines. b) Number of complete single-copy BUSCOs plotted against number of complete duplicated BUSCOs, from a total of 954 orthologs.

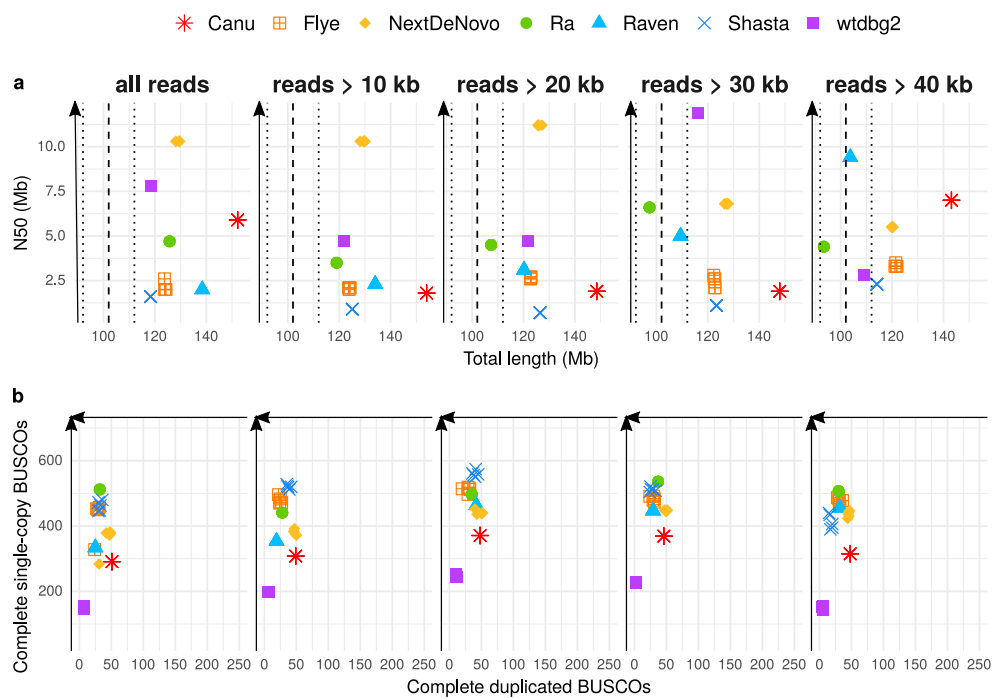

**Figure S3.** Statistics of Nanopore assemblies obtained from the full Nanopore dataset or with a read-filtering step prior to assembly based on read length exclusively, using different thresholds: 10 kb, 20 kb, 30 kb, 40 kb. All assemblies were run five times to assess the reproducibility of the output produced by each assembler. a) N50 plotted against total assembly length. The dashed line indicates the expected genome size, with +/- 10 Mb margin delimited by the dotted lines. b) Number of complete single-copy BUSCOs plotted against number of complete duplicated BUSCOs, from a total of 954 orthologs.

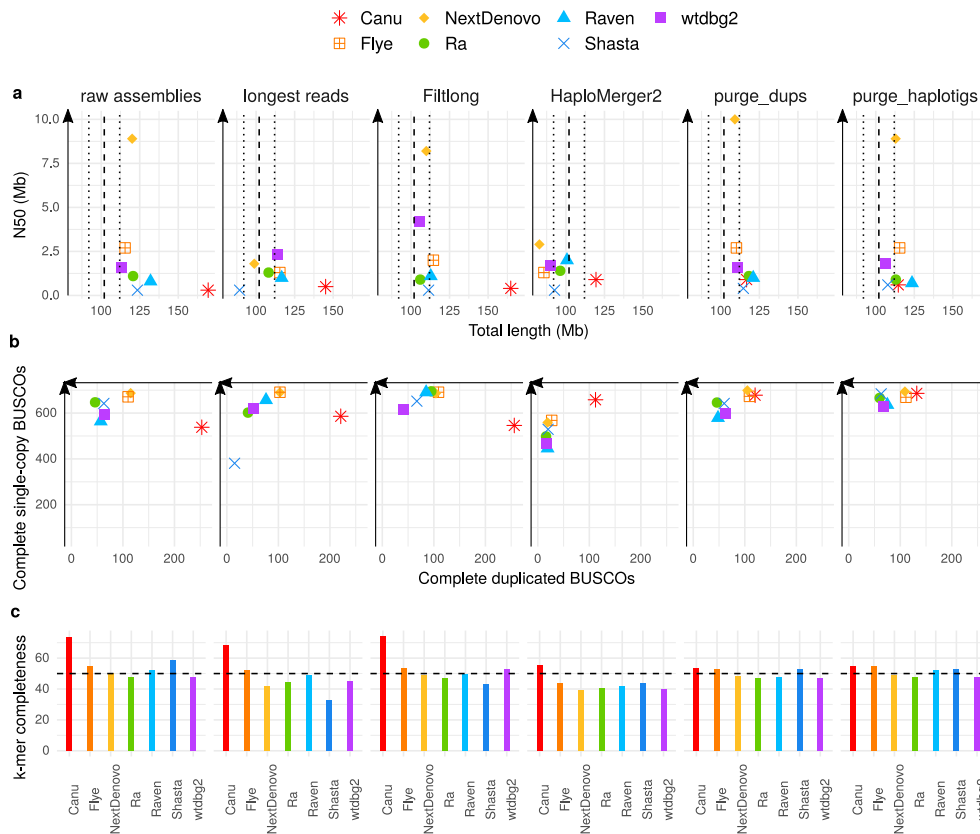

**Figure S4.** Statistics of raw assemblies obtained from the full PacBio dataset (raw assemblies), with a preliminary read filtering step (keeping only reads larger than 15 kb, or those selected by Filtlong based on quality and length) or a subsequent removal of uncollapsed haplotypes with HaploMerger2, purge\_dups, or purge\_haplotigs. a) N50 plotted against total assembly length. The dashed line indicates the expected genome size, with +/- 10 Mb margin delimited by the dotted lines. b) Number of complete single-copy BUSCOs plotted against number of complete duplicated BUSCOs, from a total of 954 orthologs. c) *k*-mer completeness. The dashed line indicates the expected 50% completeness.

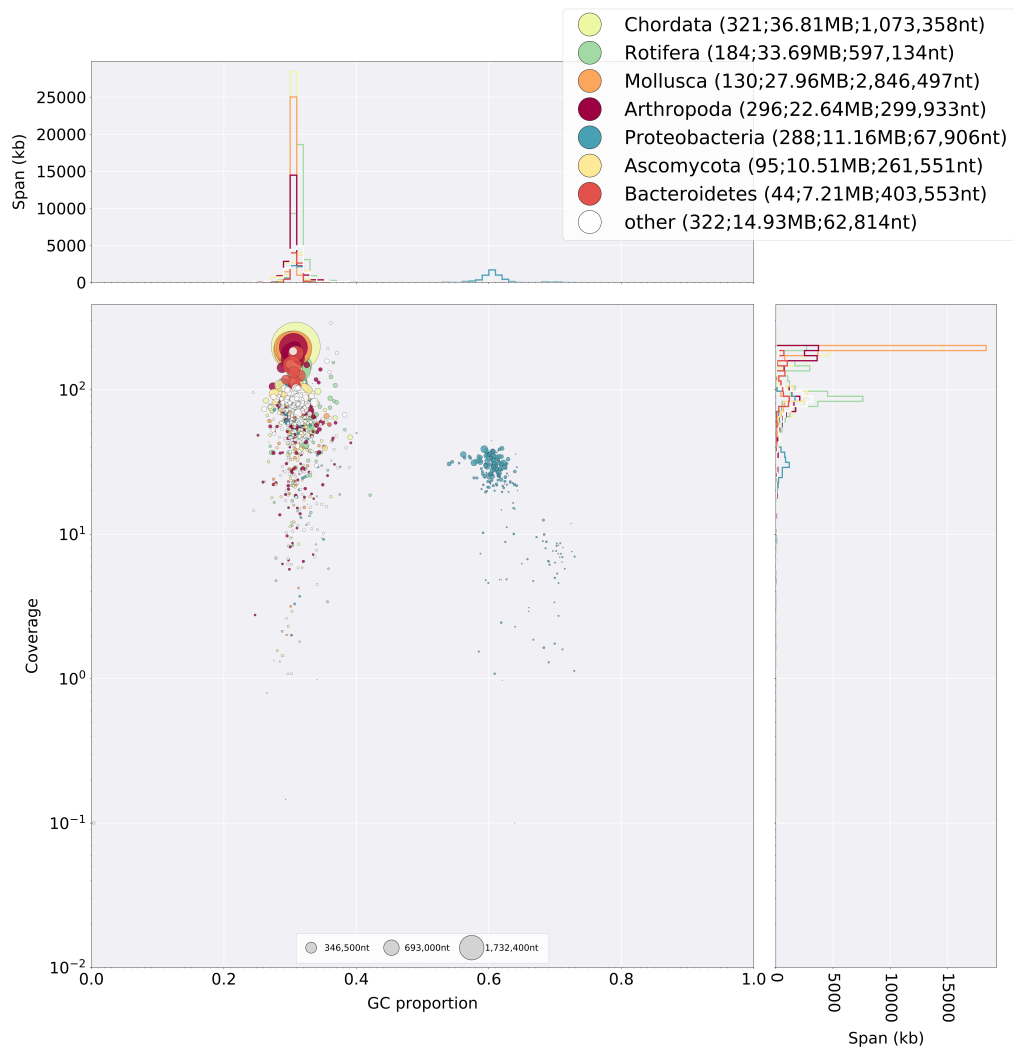

**Figure S5.** Blobtools v1.0 (Challis et al., 2020) analysis of a Canu assembly of the full PacBio dataset.

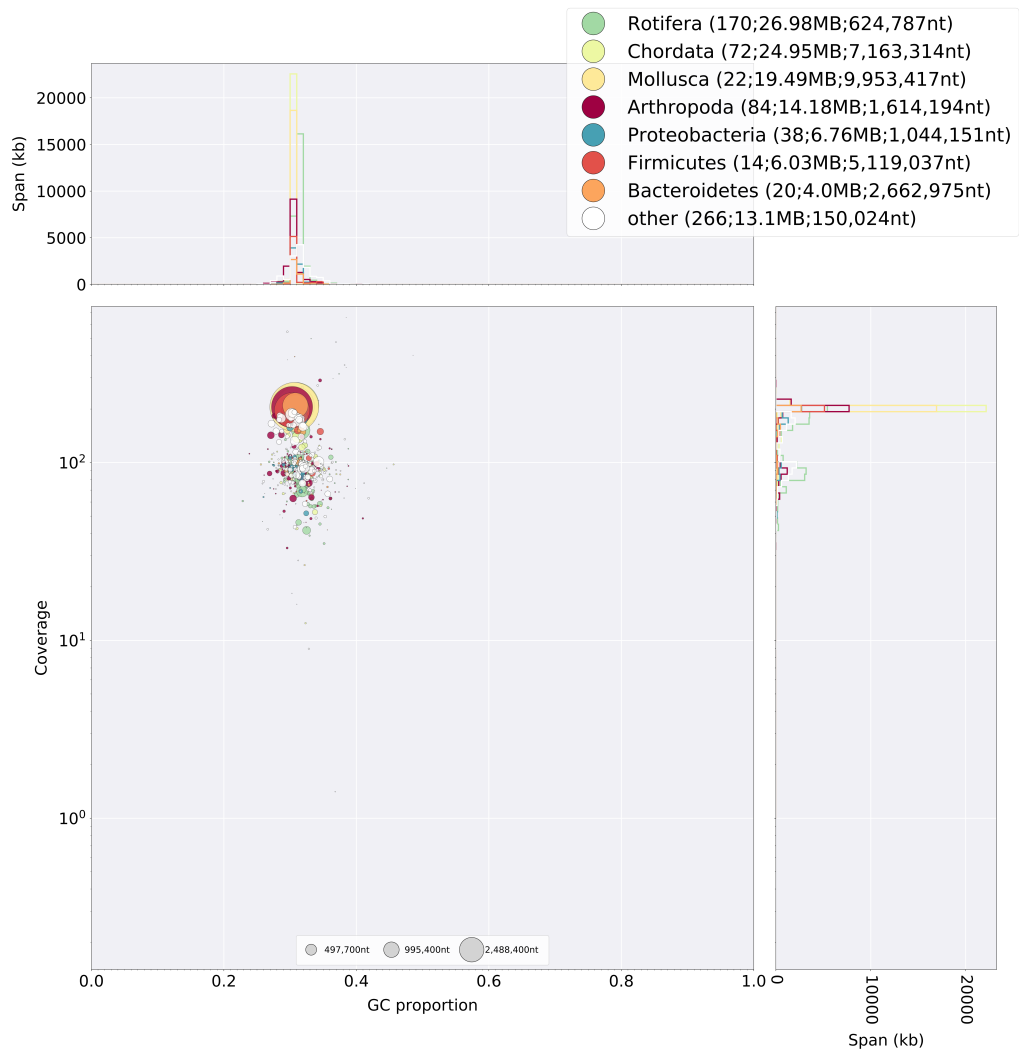

**Figure S6.** Blobtools v1.0 analysis of a Flye assembly of the full PacBio dataset.

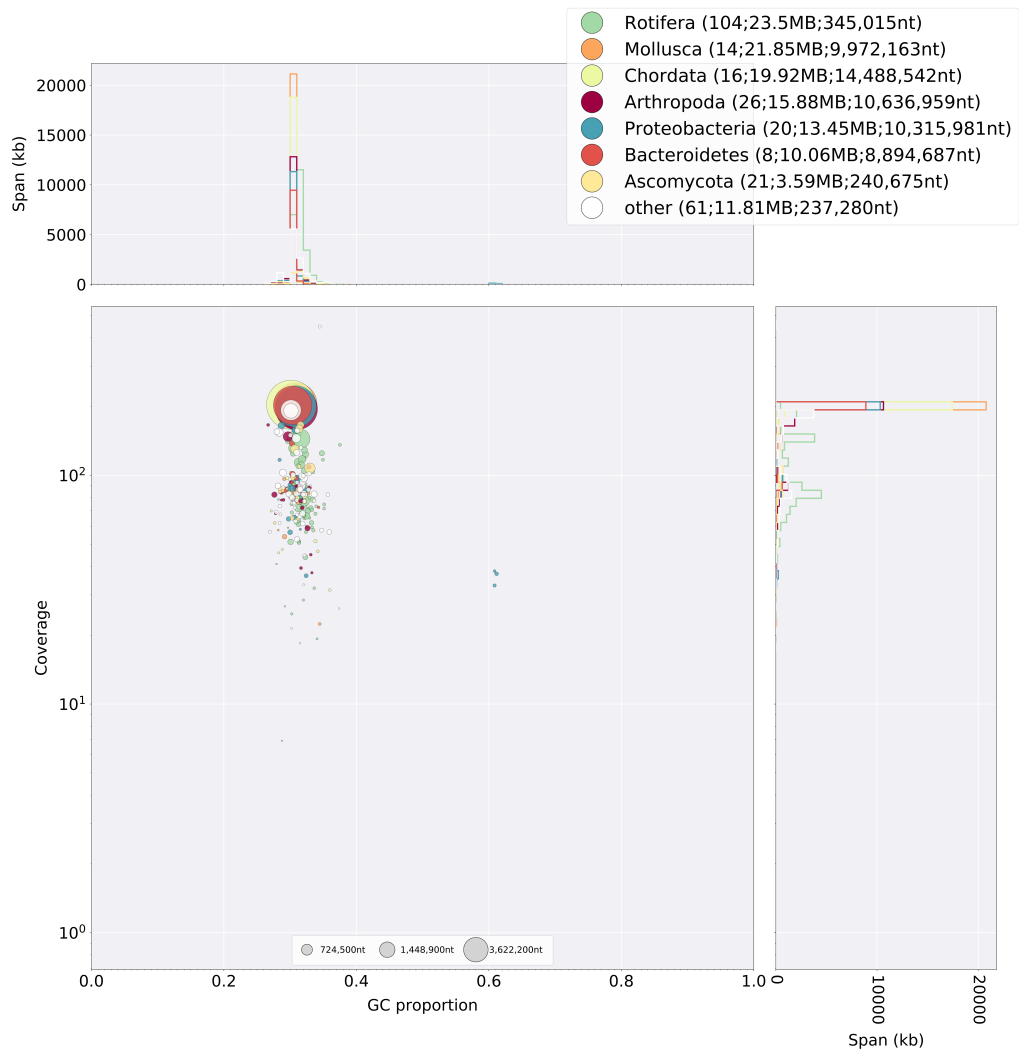

**Figure S7.** Blobtools v1.0 analysis of a NextDenovo assembly of the full PacBio dataset.

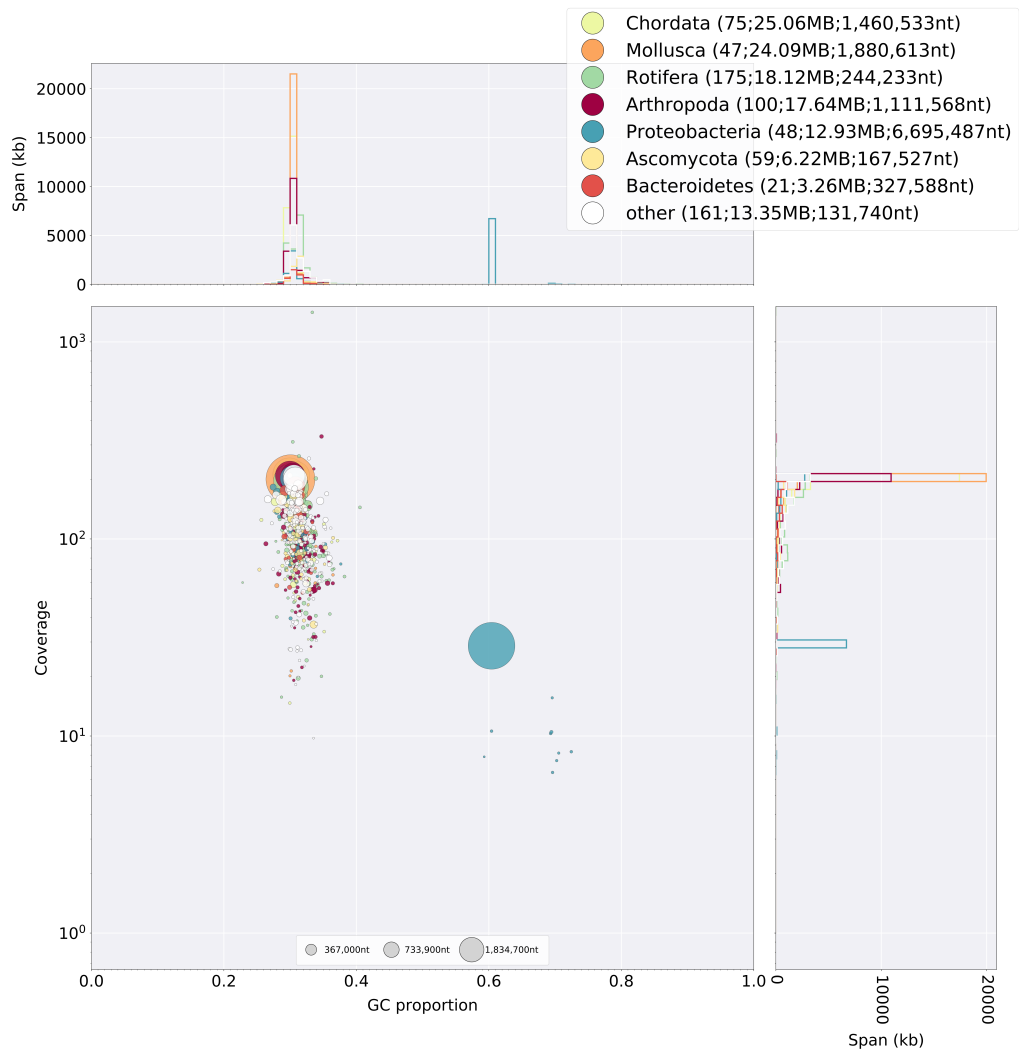

**Figure S8.** Blobtools v1.0 analysis of a Ra assembly of the full PacBio dataset.



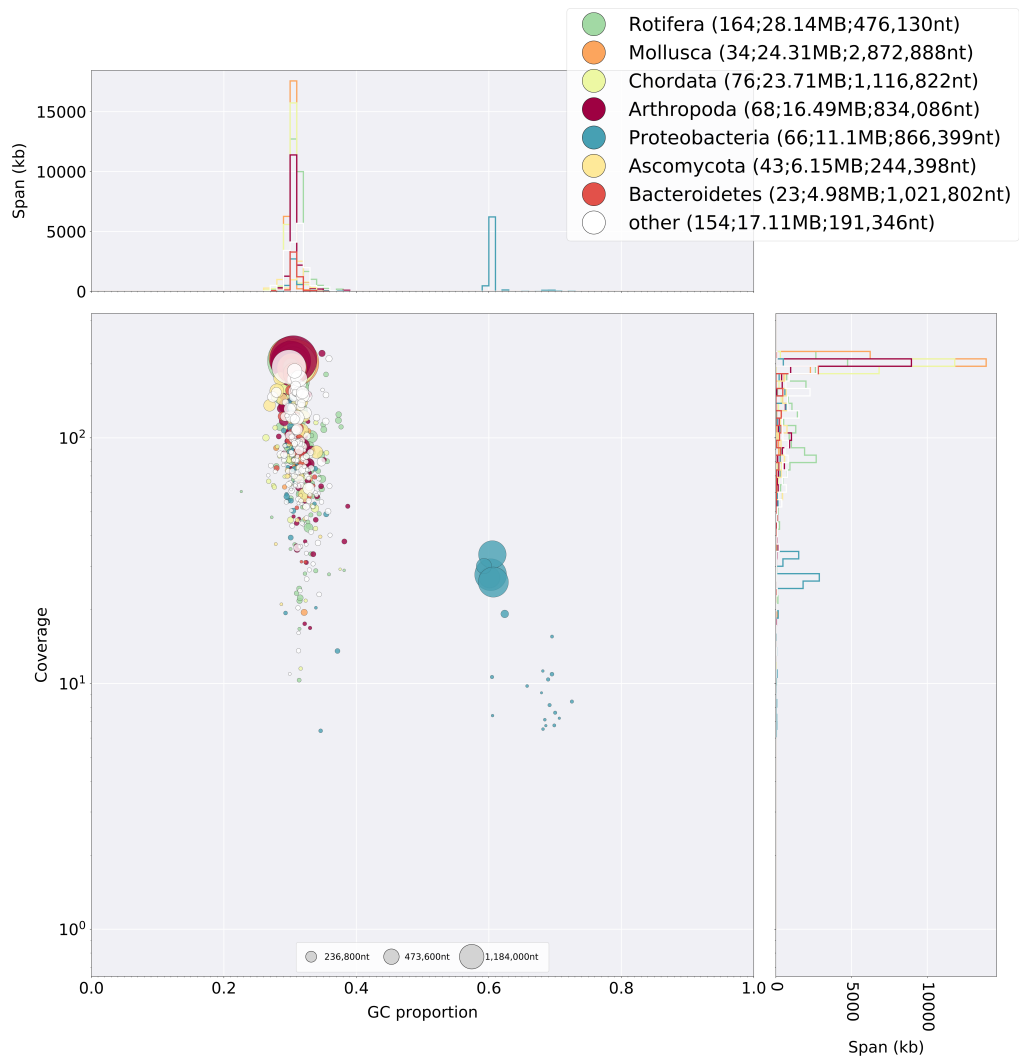

**Figure S9.** Blobtools v1.0 analysis of a Raven assembly of the full PacBio dataset.

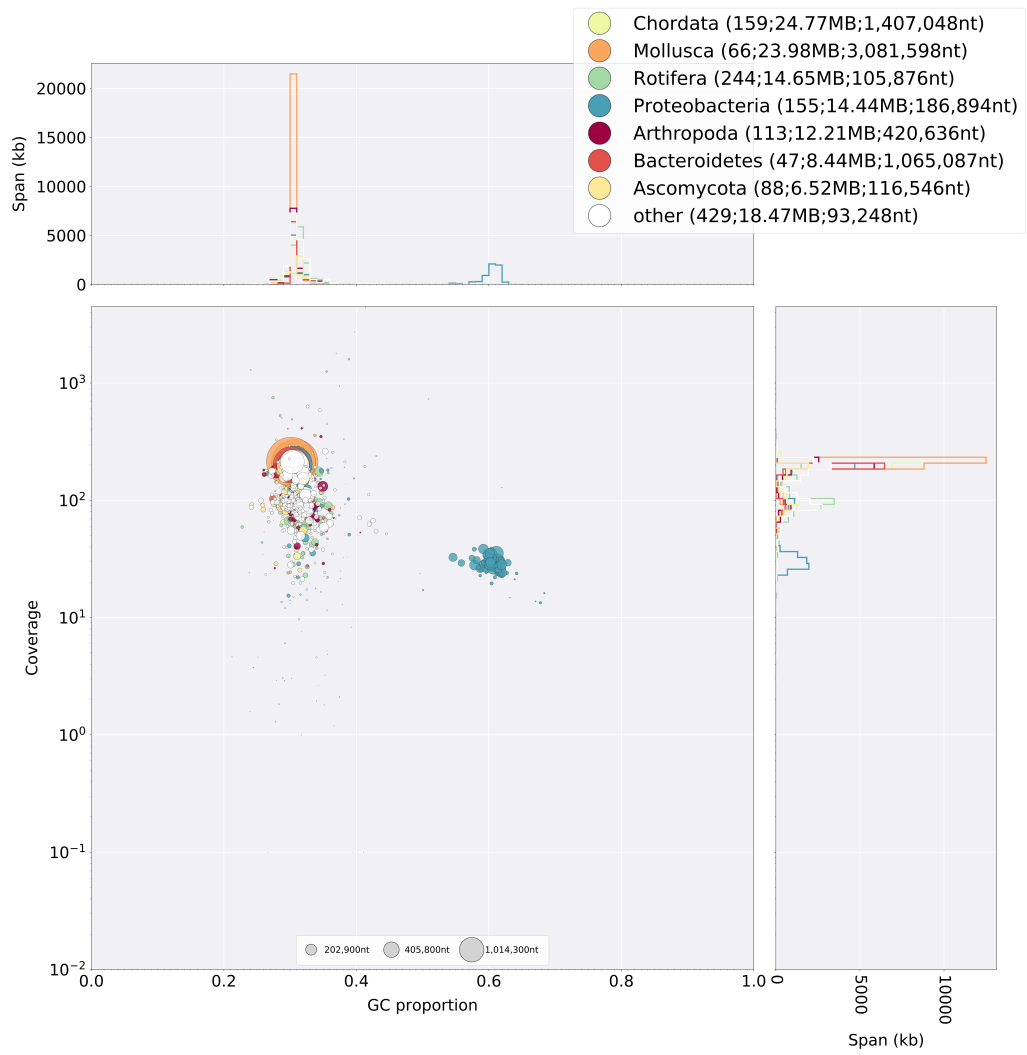

**Figure S10.** Blobs tools v1.0 analysis of a Shasta assembly of the full PacBio dataset.

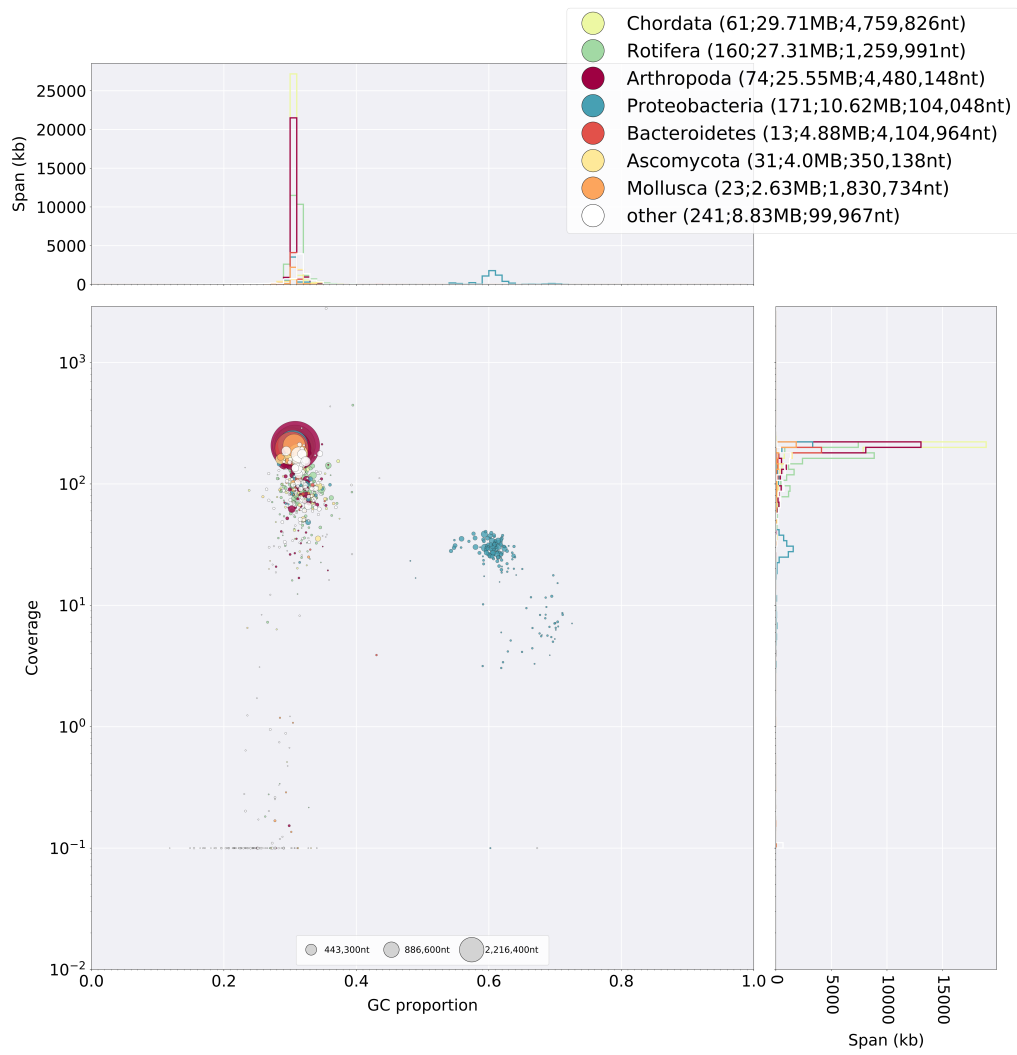

**Figure S11.** Blobtools v1.0 analysis of a wtdbg2 assembly of the full PacBio dataset.

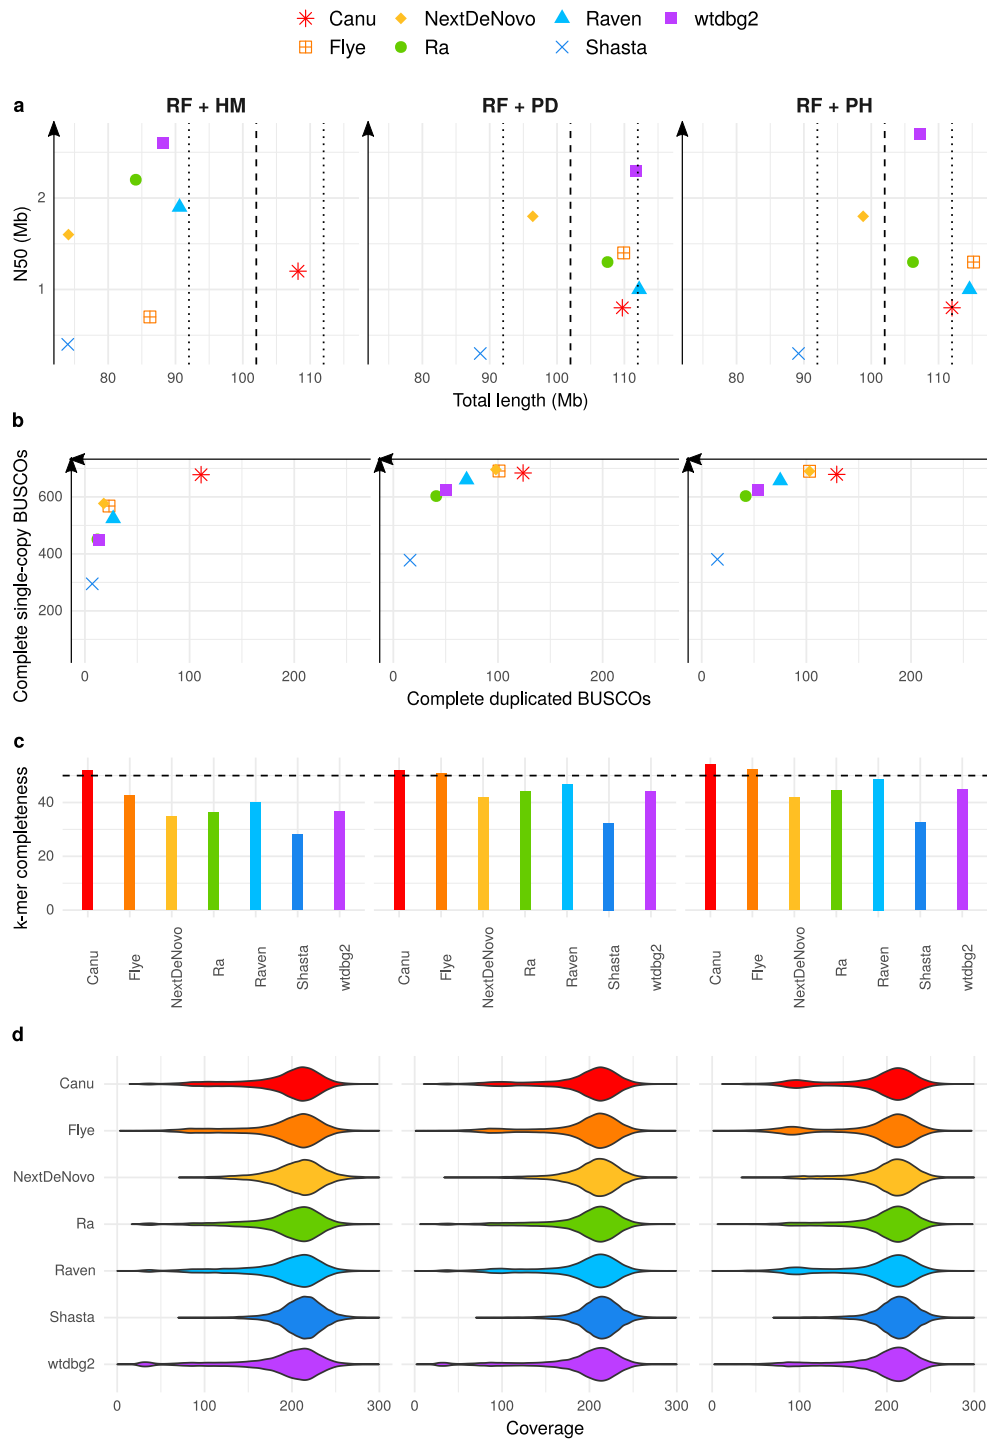

**Figure S12.** Statistics of PacBio assemblies obtained from the filtered PacBio dataset of reads longer than 15 kb, with a subsequent removal of uncollapsed haplotypes with HaploMerger2 (HM), purge\_dups (PD), or purge\_haplotigs (PH). a) N50 plotted against total assembly length. The dashed line indicates the expected genome size, with a +/- 10 Mb margin delimited by the dotted lines. b) Number of complete single-copy BUSCOs plotted against number of complete duplicated BUSCOs, from a total of 954 orthologs. c) *k*-mer completeness. The dashed line indicates the expected 50% completeness. d) Long-read coverage distribution over the contigs.

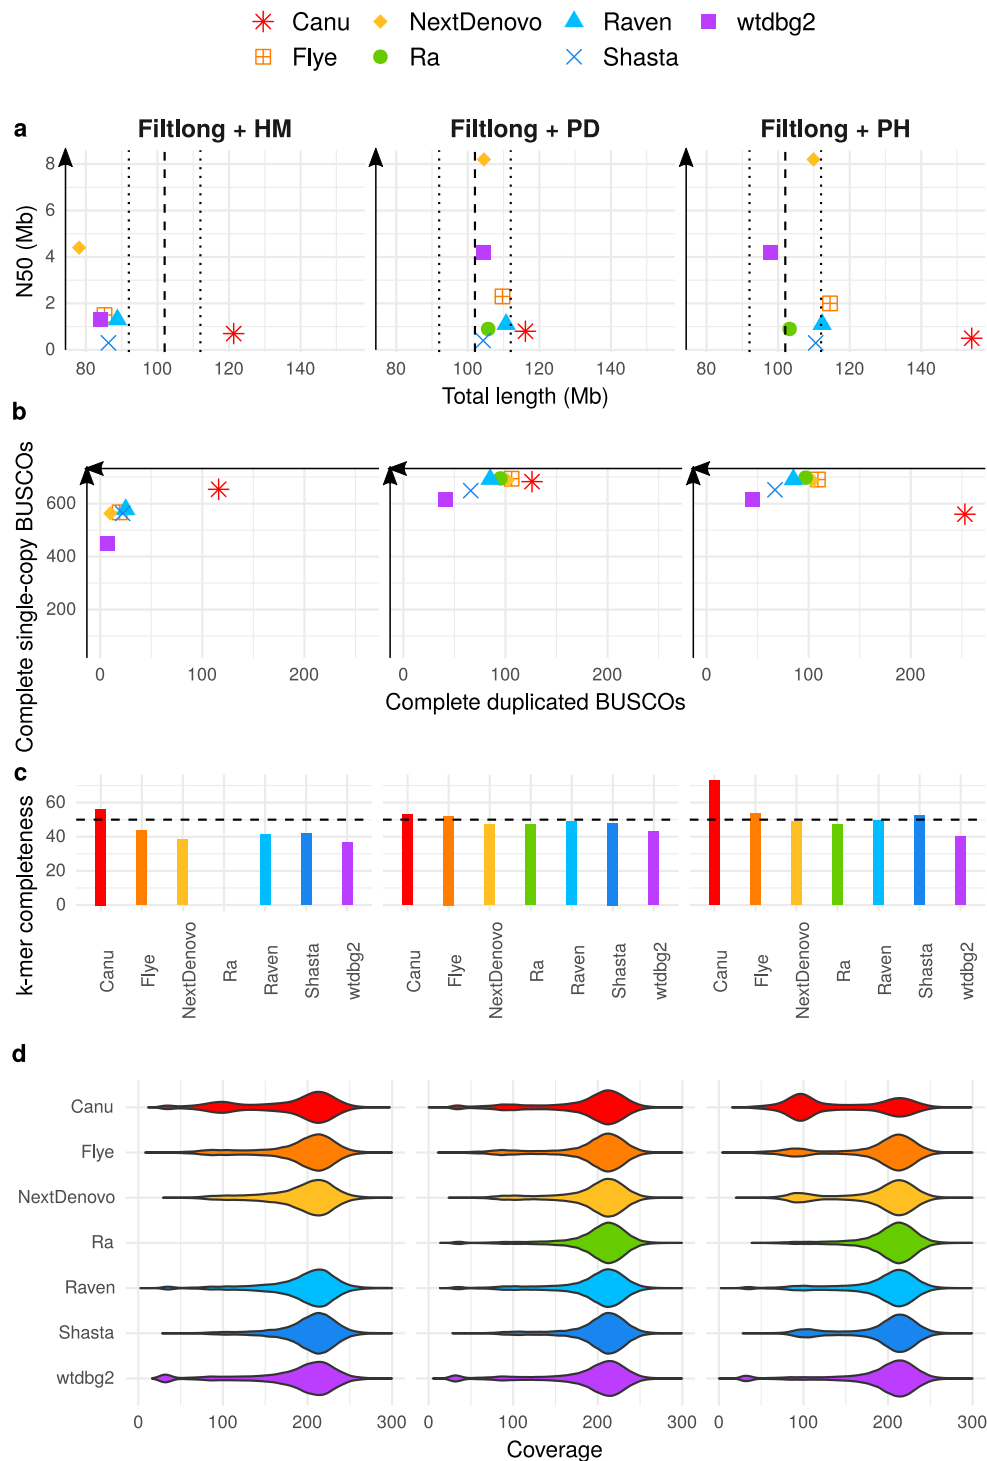

**Figure S13.** Statistics of PacBio assemblies obtained from the PacBio dataset filtered with Filtrlong, with a subsequent removal of uncollapsed haplotypes with HaploMerger2 (HM), purge\_dups (PD), or purge\_haplotigs (PH). a) N50 plotted against total assembly length. The dashed line indicates the expected genome size, with a +/- 10 Mb margin delimited by the dotted lines. b) Number of complete single-copy BUSCOs plotted against number of complete duplicated BUSCOs, from a total of 954 orthologs. c) *k*-mer completeness. The dashed line indicates the expected 50% completeness. d) Long-read coverage distribution over the contigs.

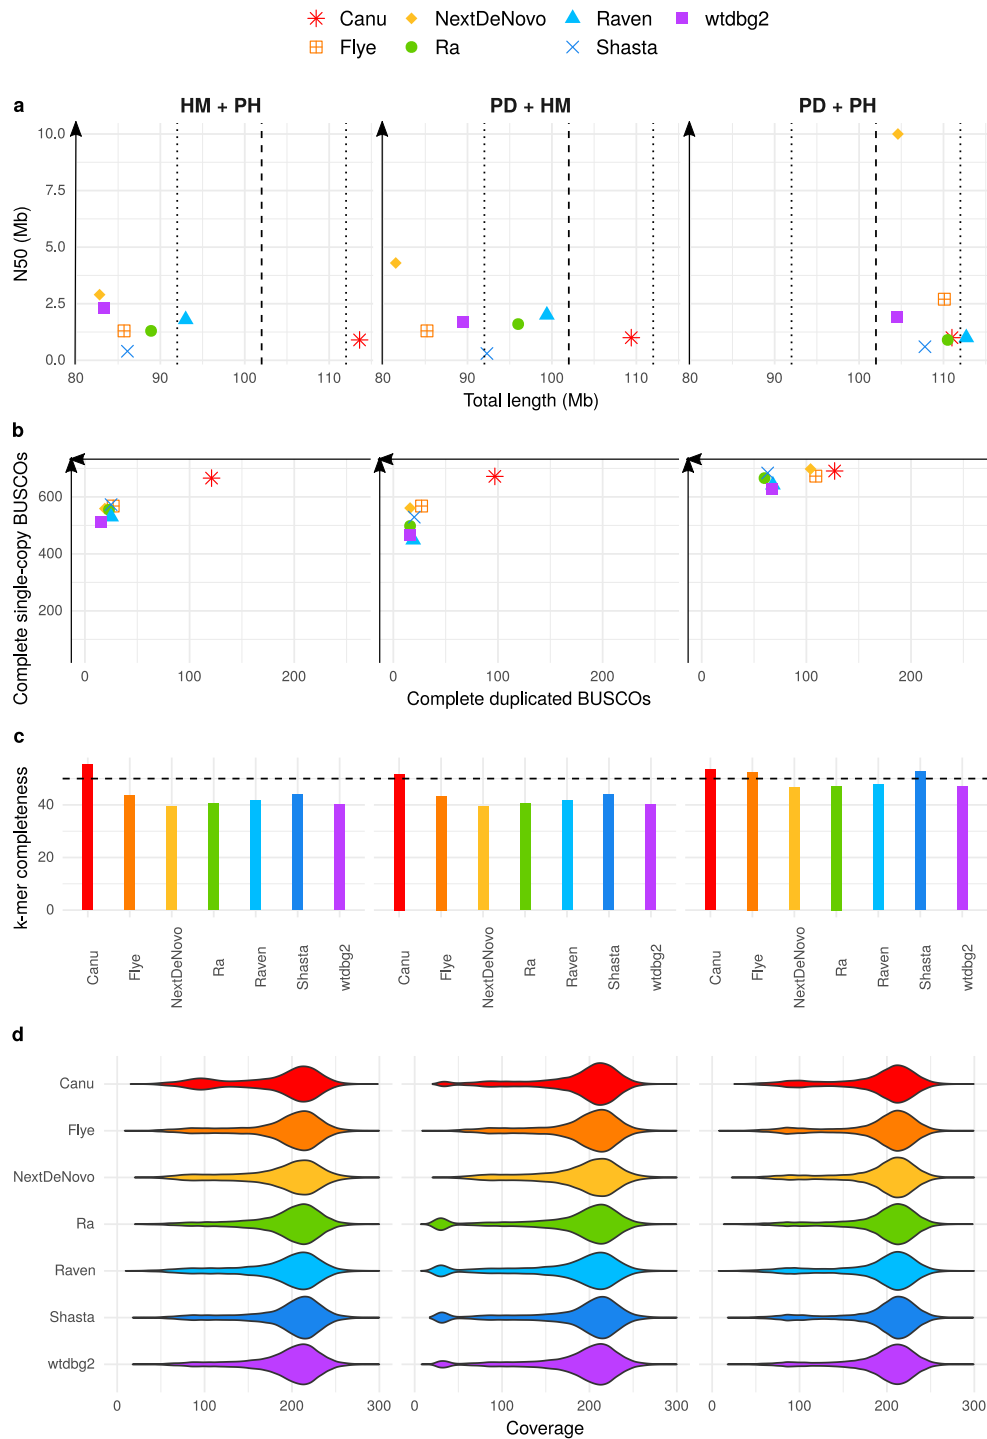

**Figure S14.** Statistics of PacBio assemblies obtained from the full PacBio dataset with a subsequent removal of uncollapsed haplotypes with combinations of HaploMerger2 (HM), purge\_dups (PD), and purge\_haplotigs (PH). a) N50 plotted against total assembly length. The dashed line indicates the expected genome size, with a +/- 10 Mb margin delimited by the dotted lines. b) Number of complete single-copy BUSCOs plotted against number of complete duplicated BUSCOs, from a total of 954 orthologs. c) *k*-mer completeness. The dashed line indicates the expected 50% completeness. d) Long-read coverage distribution over the contigs.

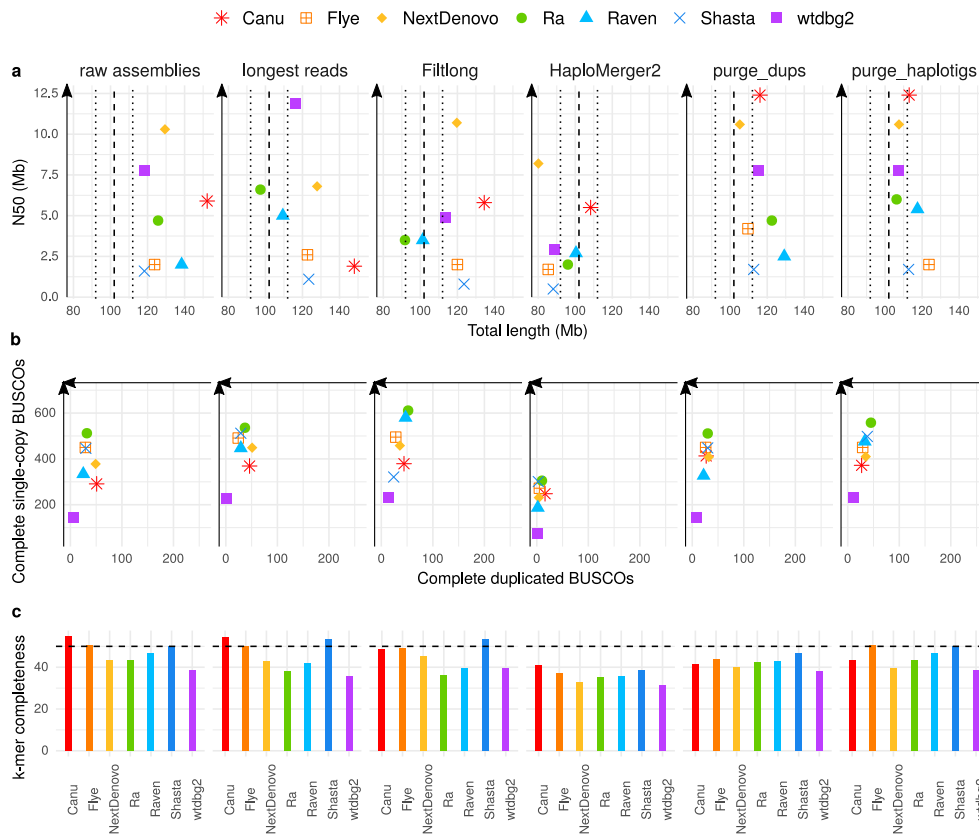

**Figure S15.** Statistics of raw assemblies obtained from the full Nanopore dataset (raw assemblies), with a preliminary read filtering step (keeping only reads larger than 30 kb, or those selected by Filtlong based on quality and length) or a subsequent removal of uncollapsed haplotypes with HaploMerger2, purge\_dups, or purge\_haplotigs. a) N50 plotted against total assembly length. The dashed line indicates the expected genome size, with +/- 10 Mb margin delimited by the dotted lines. b) Number of complete single-copy BUSCOs plotted against number of complete duplicated BUSCOs, from a total of 954 orthologs. c) *k*-mer completeness. The dashed line indicates the expected 50% completeness.

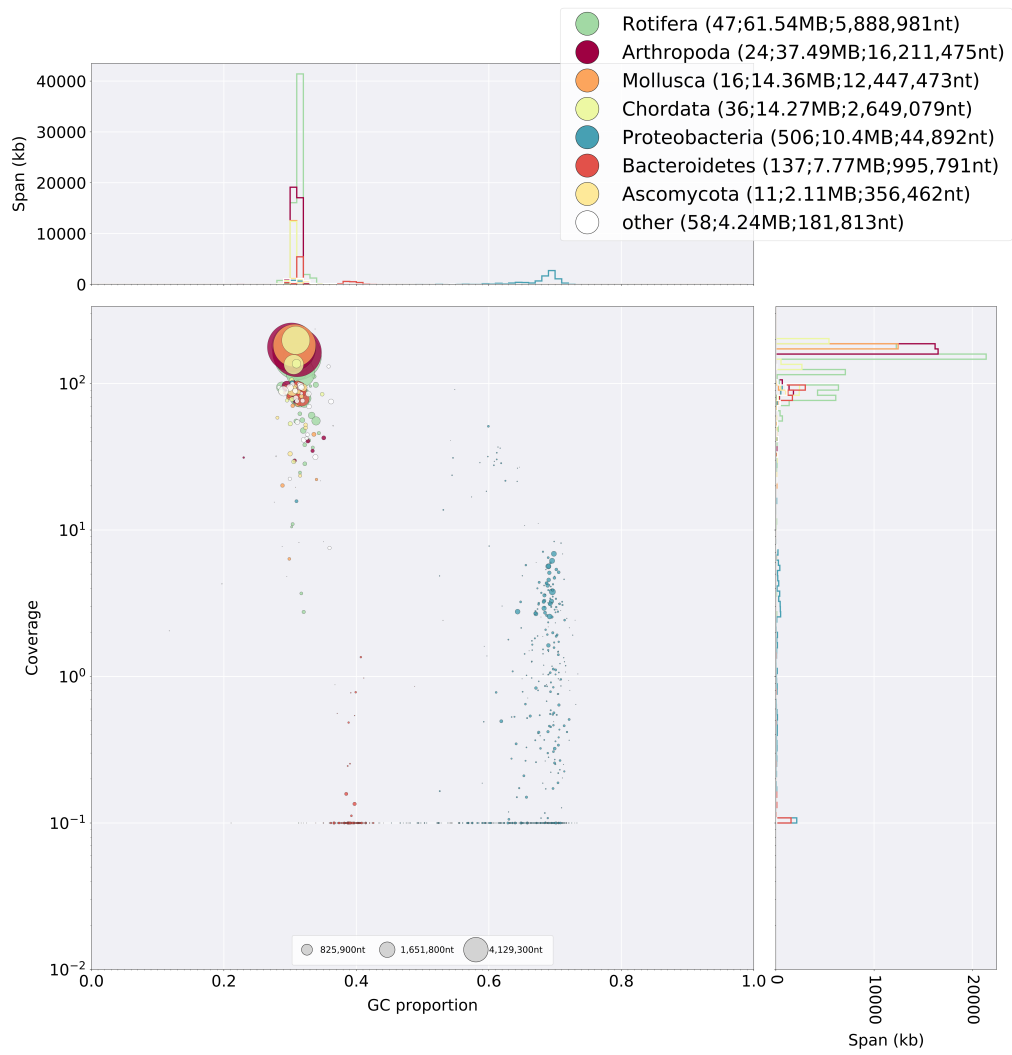

**Figure S16.** Blobtools v1.0 analysis of a Canu assembly of the full Nanopore dataset.



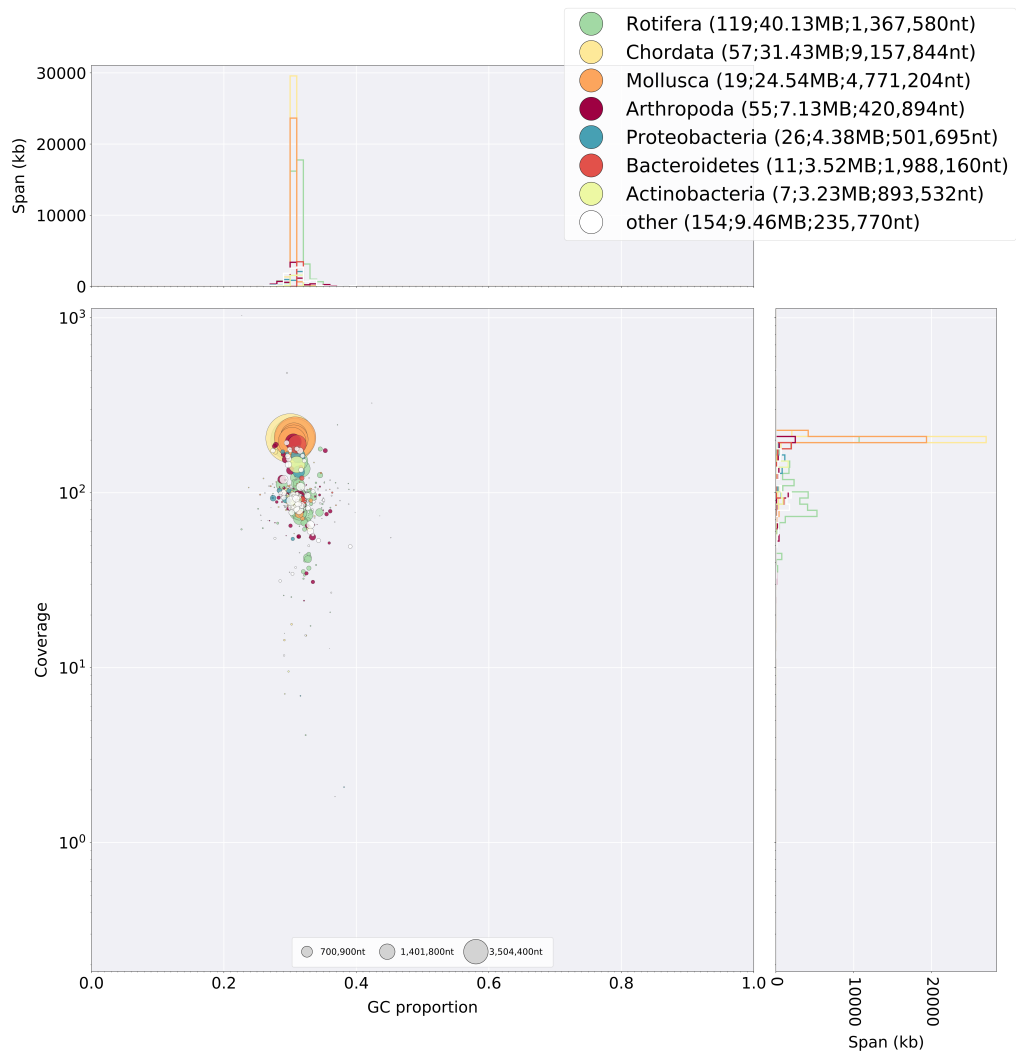

**Figure S17.** Blobtools v1.0 analysis of a Flye assembly of the full Nanopore dataset.

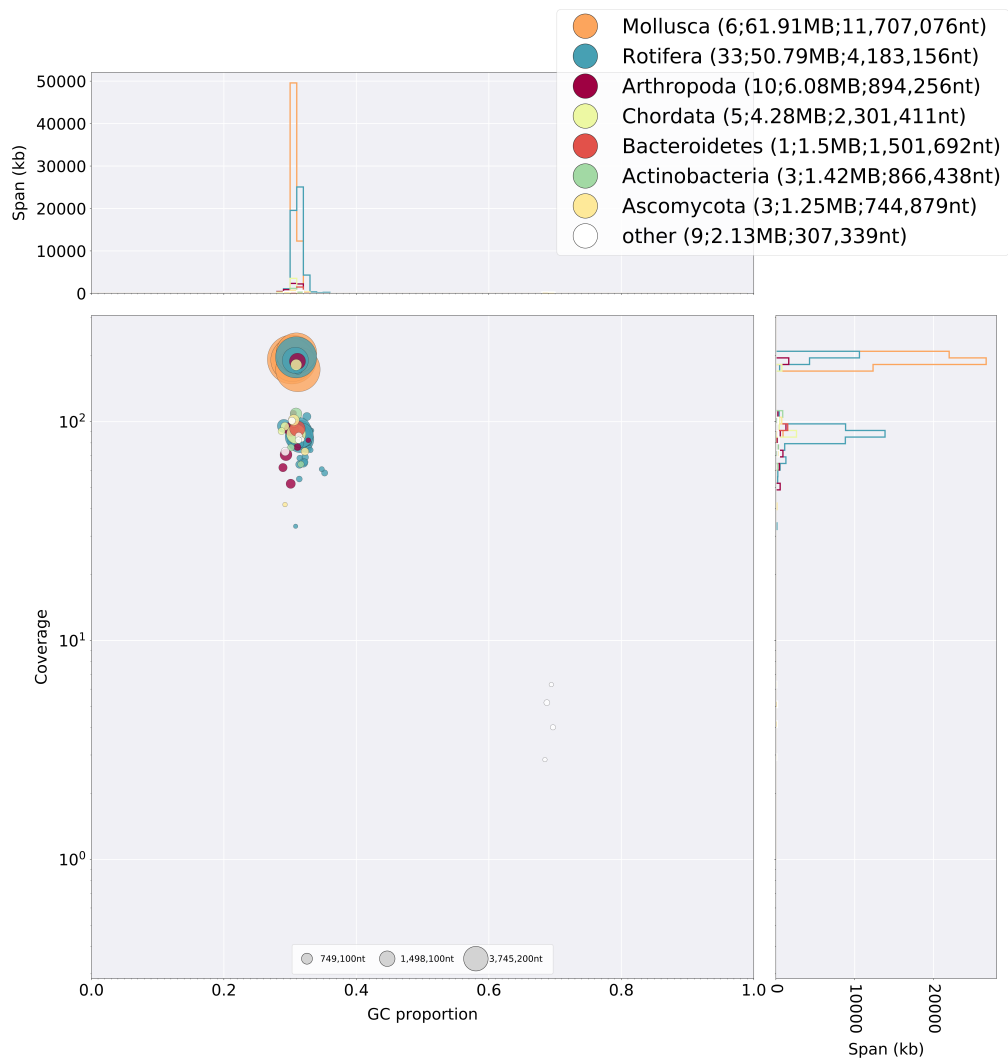

**Figure S18.** Blobtools v1.0 analysis of a NextDenovo assembly of the full Nanopore dataset.

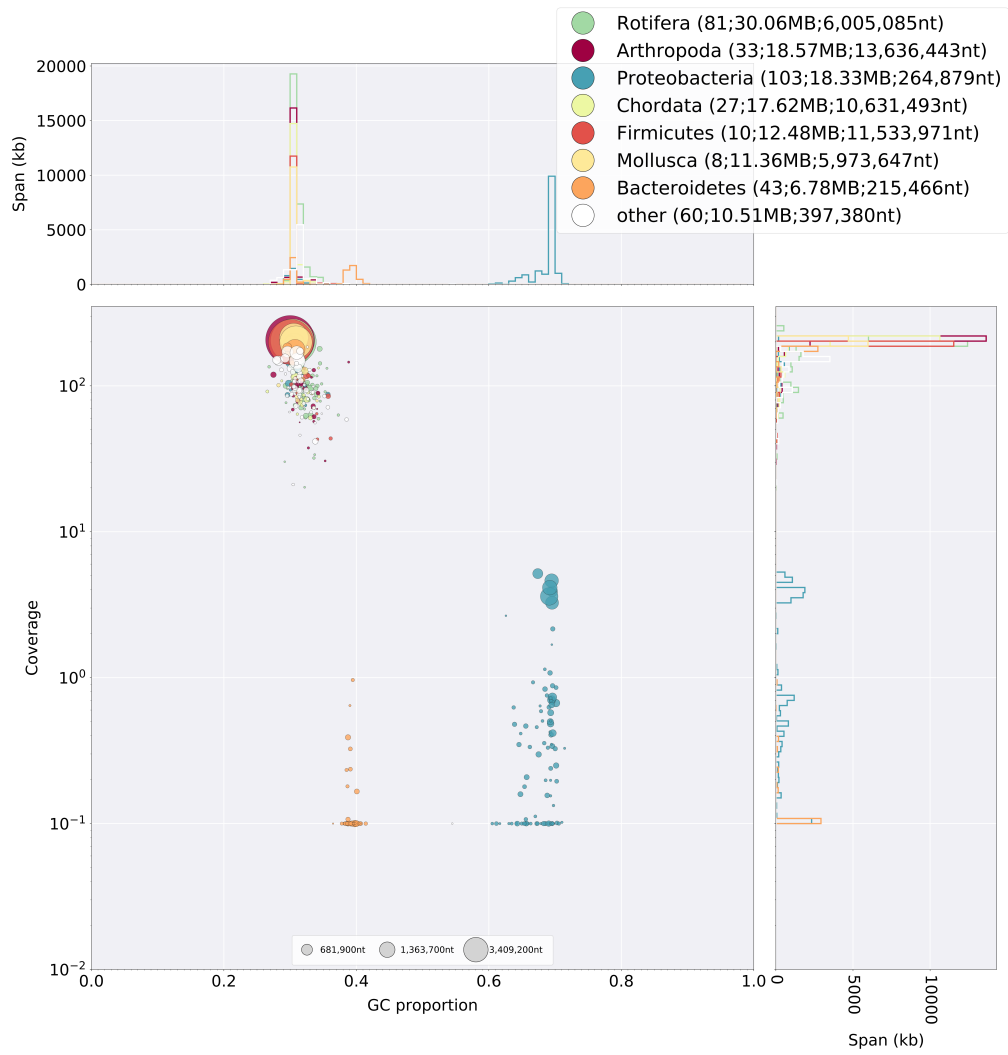

**Figure S19.** Blobs tools v1.0 analysis of a Ra assembly of the full Nanopore dataset.

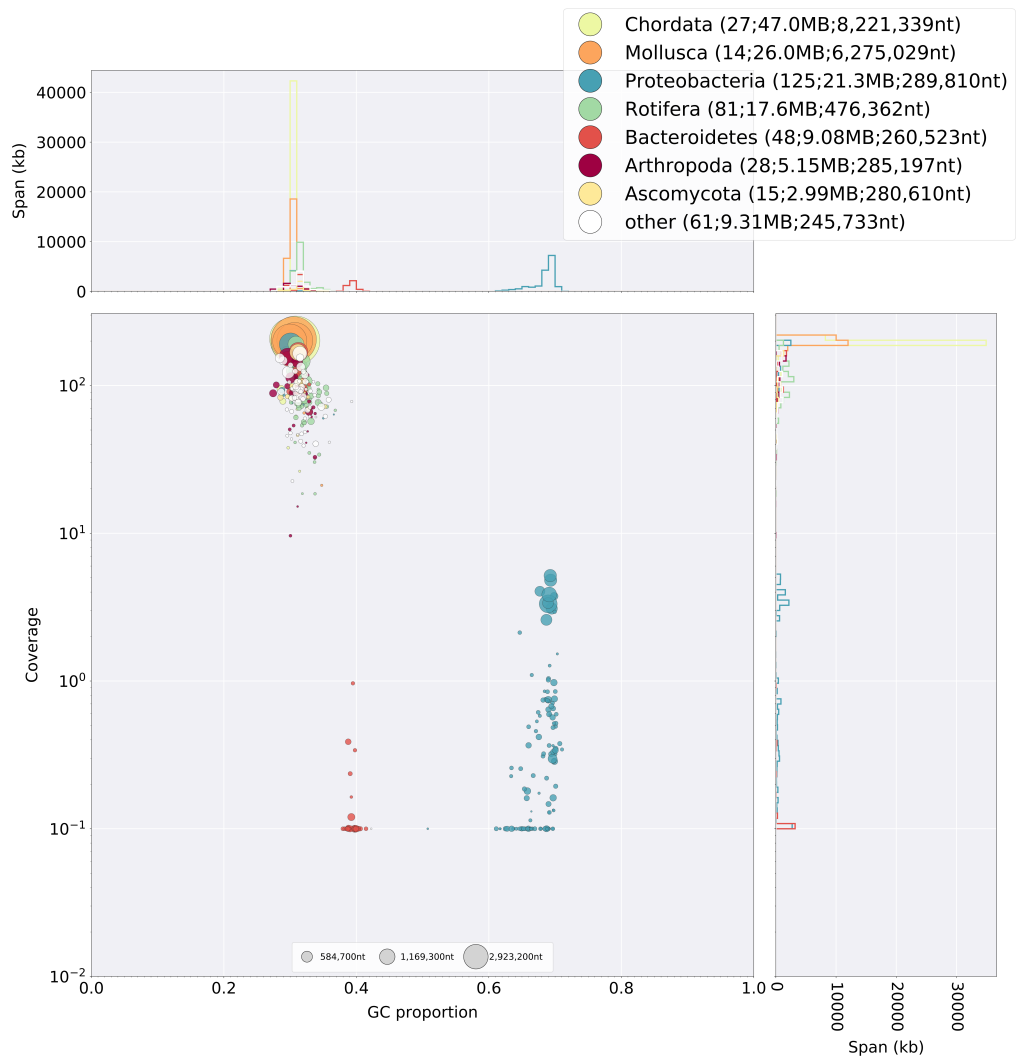

**Figure S20.** Blobtools v1.0 analysis of a Raven assembly of the full Nanopore dataset.

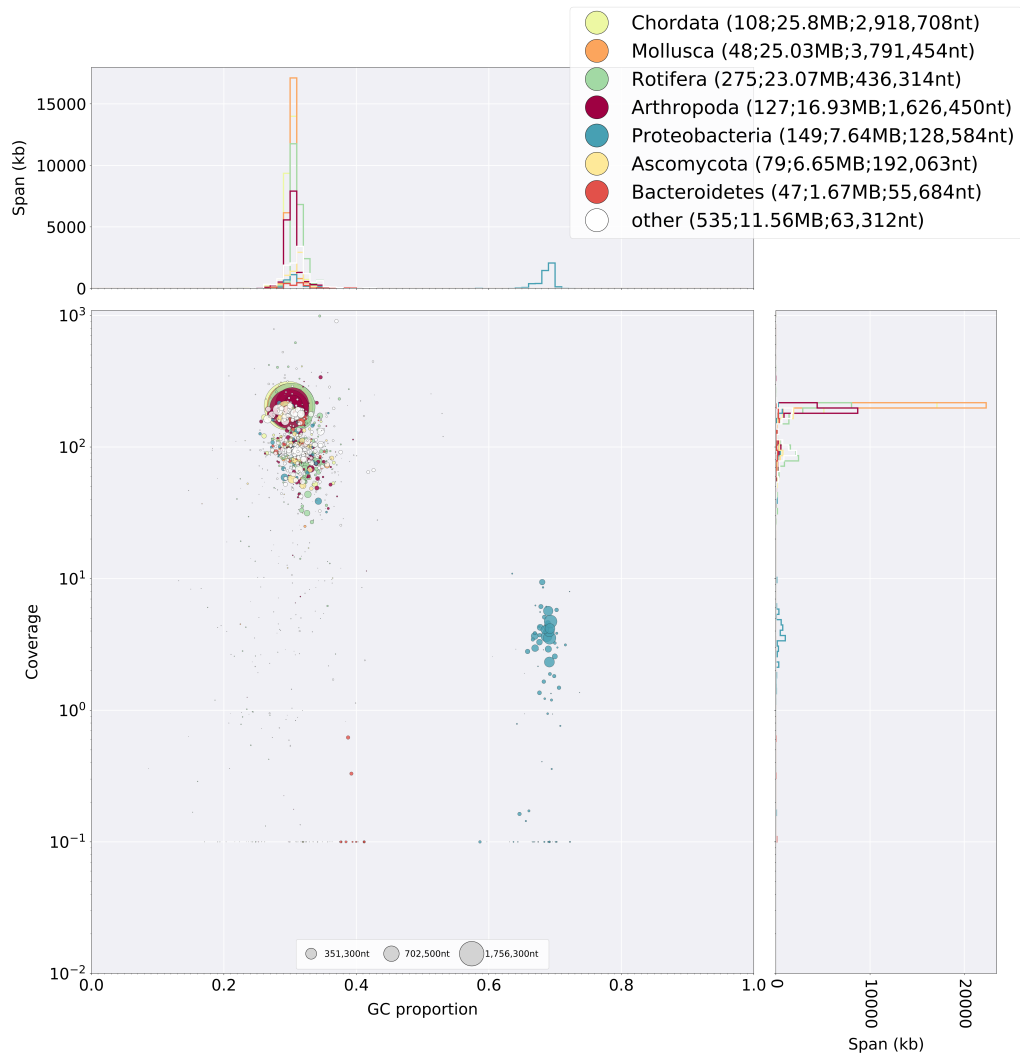

**Figure S21.** Blobs tools v1.0 analysis of a Shasta assembly of the full Nanopore dataset.

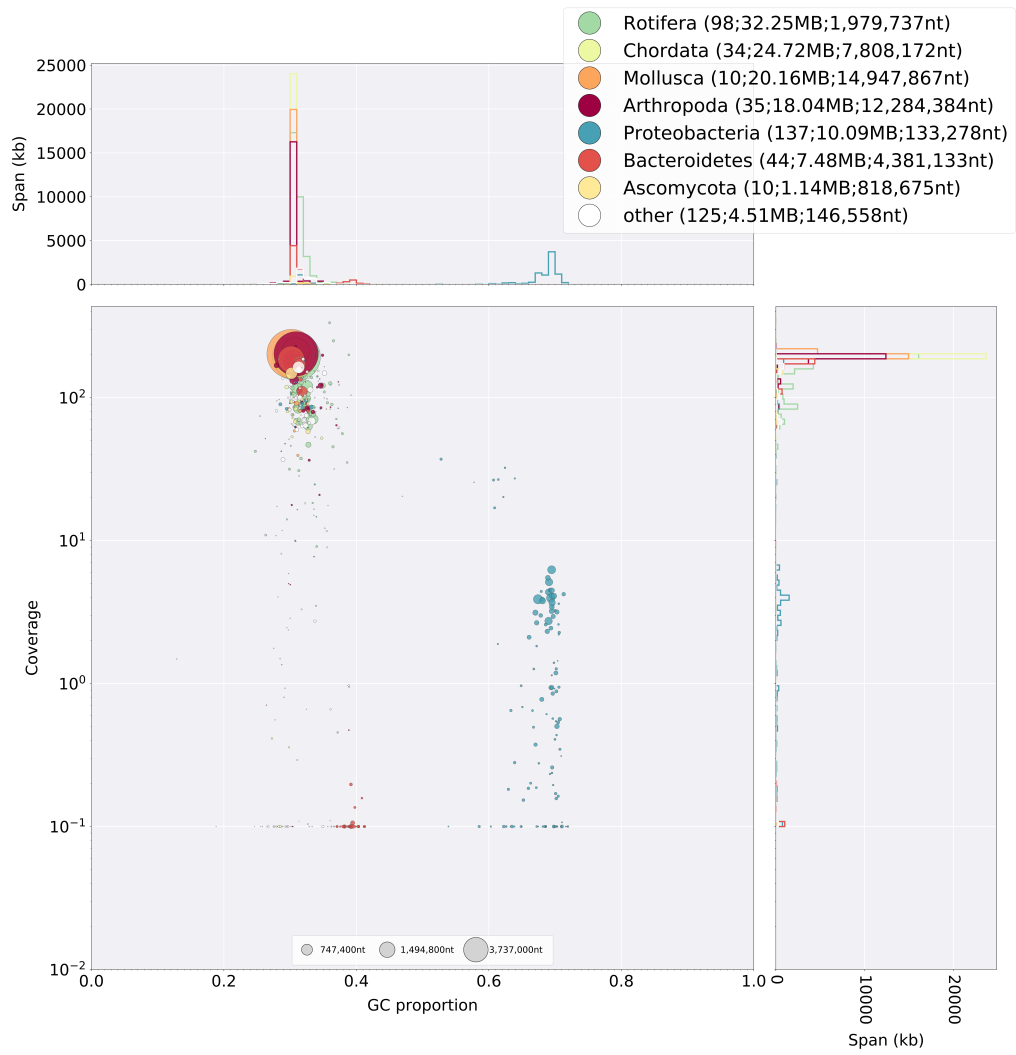

**Figure S22.** Blobs tools v1.0 analysis of a wtdbg2 assembly of the full Nanopore dataset.

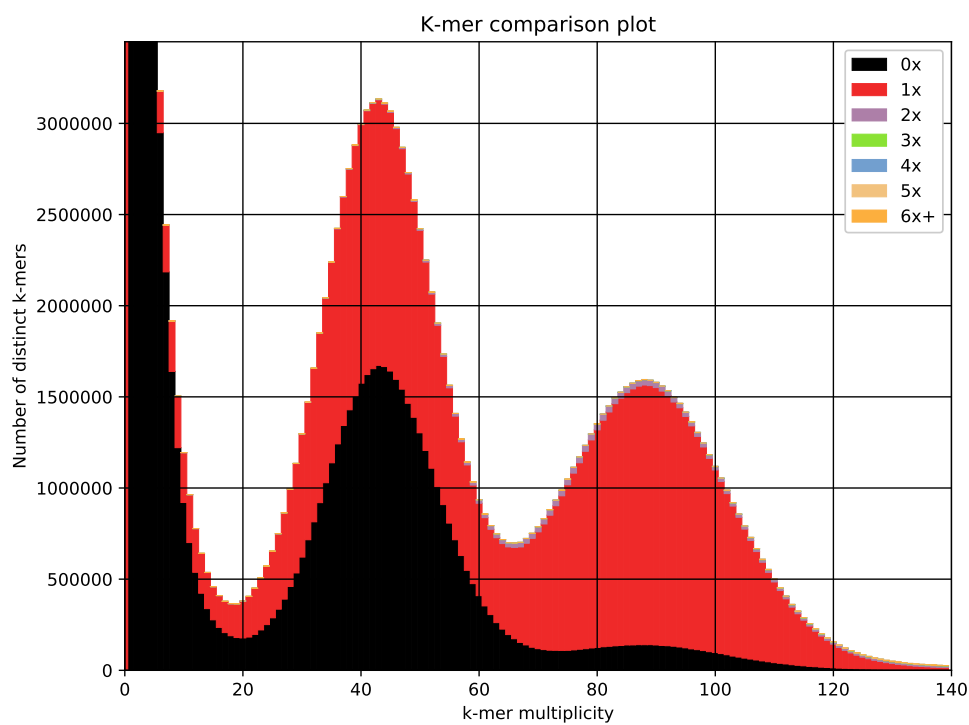

**Figure S23.** *k*-mer spectrum of the Shasta assembly of the full Nanopore dataset obtained with KAT v2.4.2.

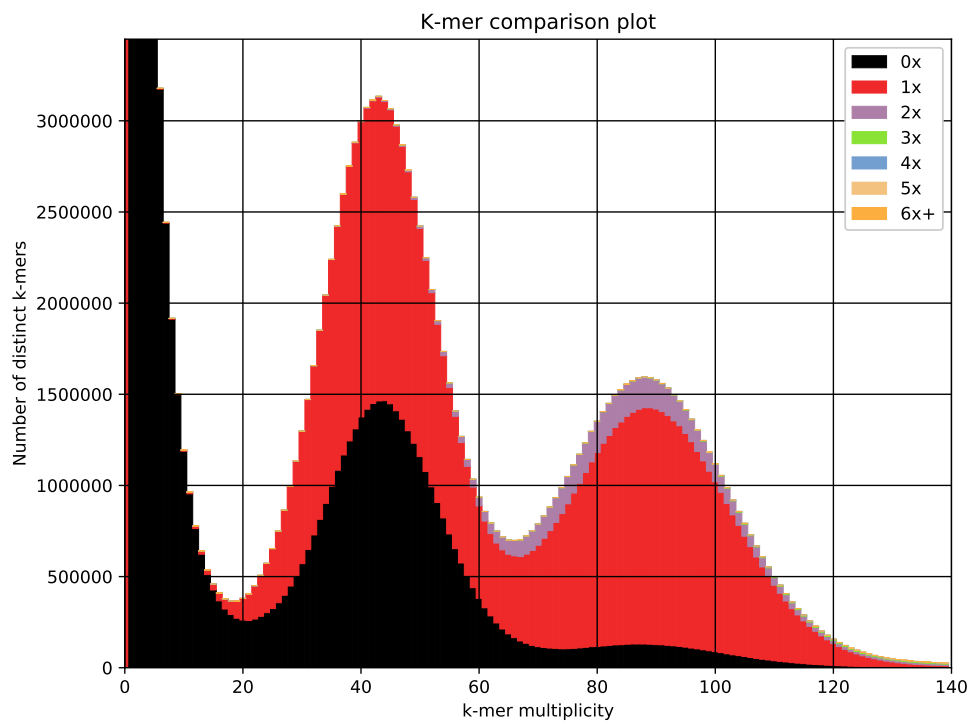

**Figure S24.** *k*-mer spectrum of the Shasta assembly of the longest Nanopore reads obtained with KAT v2.4.2.

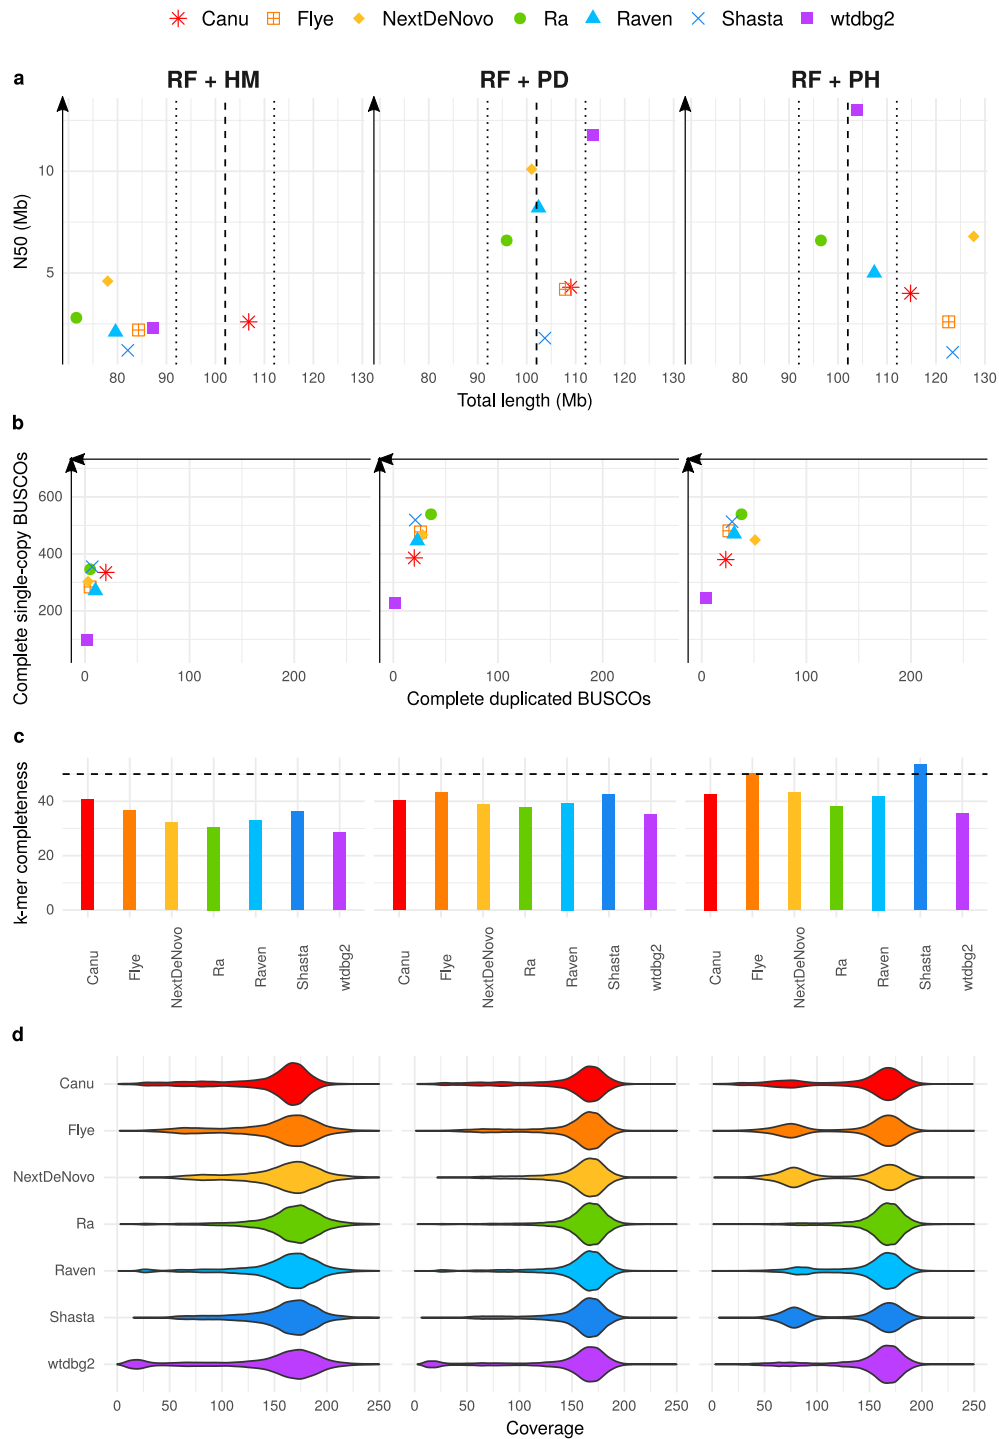

**Figure S25.** Statistics of Nanopore assemblies obtained from the filtered Nanopore dataset of reads longer than 30 kb, with a subsequent removal of uncollapsed haplotypes with HaploMerger2 (HM), purge\_dups (PD), or purge\_haplotigs (PH). a) N50 plotted against total assembly length. The dashed line indicates the expected genome size, with a +/- 10 Mb margin delimited by the dotted lines. b) Number of complete single-copy BUSCOs plotted against number of complete duplicated BUSCOs, from a total of 954 orthologs. c) *k*-mer completeness. The dashed line indicates the expected 50% completeness. d) Long-read coverage distribution over the contigs.



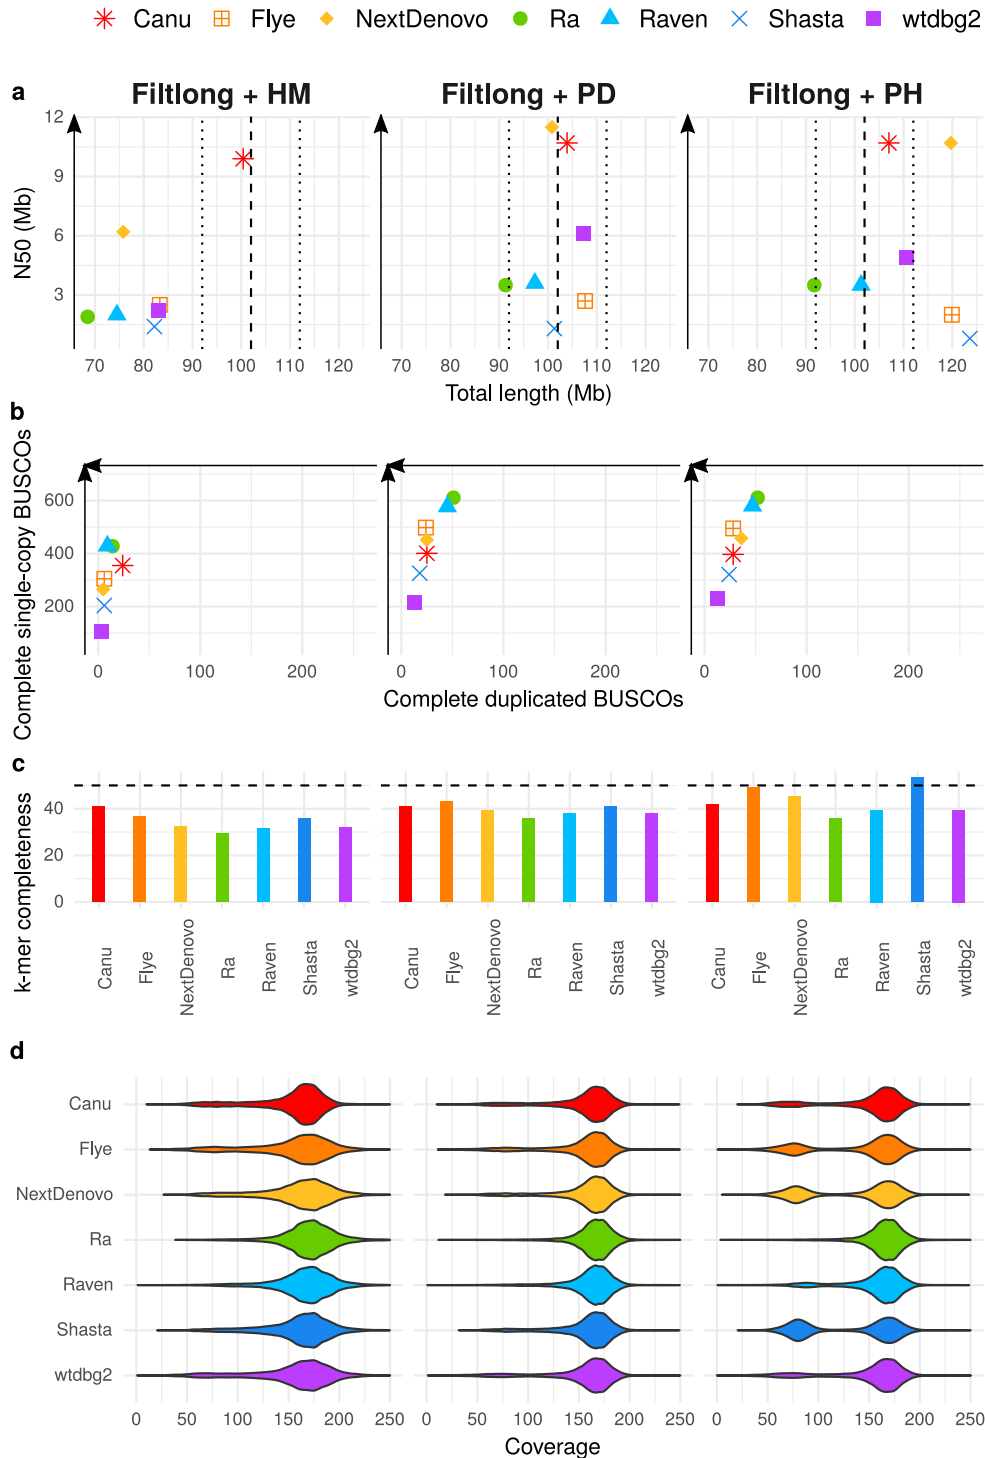

**Figure S26.** Statistics of Nanopore assemblies obtained from the Nanopore dataset filtered with Filtrlong, with a subsequent removal of uncollapsed haplotypes with HaploMerger2 (HM), purge\_dups (PD), or purge\_haplotigs (PH). a) N50 plotted against total assembly length. The dashed line indicates the expected genome size, with a +/- 10 Mb margin delimited by the dotted lines. b) Number of complete single-copy BUSCOs plotted against number of complete duplicated BUSCOs, from a total of 954 orthologs. c) *k*-mer completeness. The dashed line indicates the expected 50% completeness. d) Long-read coverage distribution over the contigs.

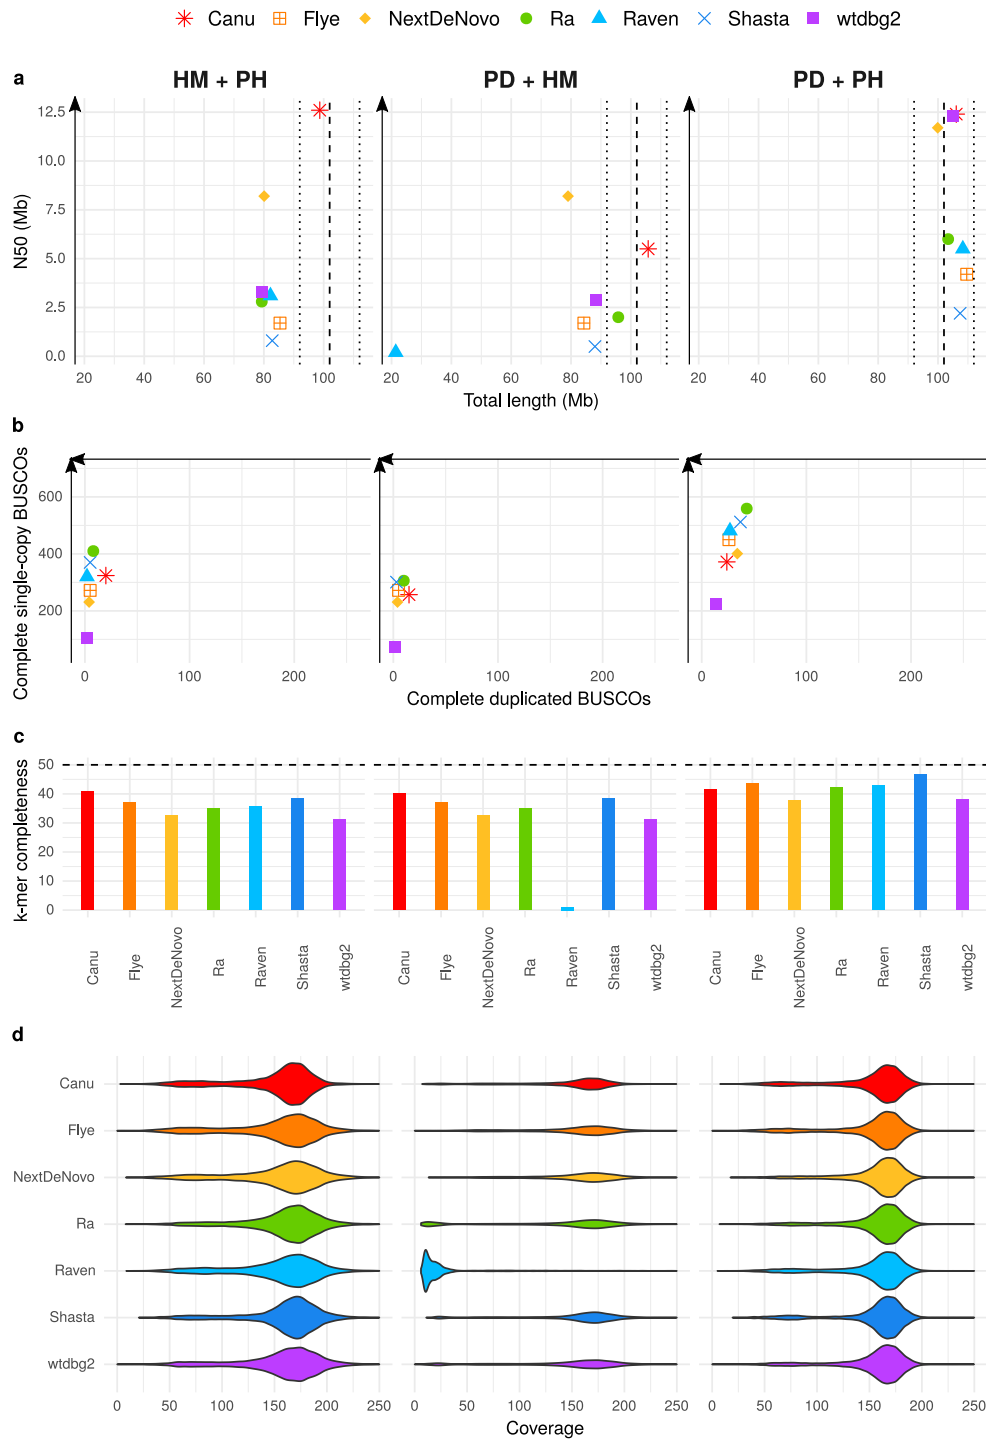

**Figure S27.** Statistics of Nanopore assemblies obtained from the full Nanopore dataset with a subsequent removal of uncollapsed haplotypes with combinations of HaploMerger2 (HM), purge\_dups (PD), and purge\_haplotigs (PH). a) N50 plotted against total assembly length. The dashed line indicates the expected genome size, with a +/- 10 Mb margin delimited by the dotted lines. b) Number of complete single-copy BUSCOs plotted against number of complete duplicated BUSCOs, from a total of 954 orthologs. c) *k*-mer completeness. The dashed line indicates the expected 50% completeness. d) Long-read coverage distribution over the contigs.

**Table S1.** Haploidy values computed by HapPy v0.1 for PacBio assemblies.

| <b>Assembler</b> | <b>Processing</b> | <b>Haploidy</b> |
|------------------|-------------------|-----------------|
| Canu             | raw assemblies    | 0.59            |
| Flye             | raw assemblies    | 0.85            |
| NextDenovo       | raw assemblies    | 0.81            |
| Ra               | raw assemblies    | 0.90            |
| Raven            | raw assemblies    | 0.82            |
| Shasta           | raw assemblies    | 0.83            |
| wtdbg2           | raw assemblies    | 0.90            |
| Canu             | longest reads     | 0.62            |
| Flye             | longest reads     | 0.85            |
| NextDenovo       | longest reads     | 0.94            |
| Ra               | longest reads     | 0.94            |
| Raven            | longest reads     | 0.88            |
| Shasta           | longest reads     | 0.96            |
| wtdbg2           | longest reads     | 0.90            |
| Canu             | Filtlong          | 0.58            |
| Flye             | Filtlong          | 0.86            |
| NextDenovo       | Filtlong          | 0.88            |
| Ra               | Filtlong          | 0.94            |
| Raven            | Filtlong          | 0.90            |
| Shasta           | Filtlong          | 0.85            |
| wtdbg2           | Filtlong          | 0.91            |
| Canu             | HaploMerger2      | 0.84            |
| Flye             | HaploMerger2      | 0.89            |
| NextDenovo       | HaploMerger2      | 0.88            |
| Ra               | HaploMerger2      | 0.92            |
| Raven            | HaploMerger2      | 0.90            |
| Shasta           | HaploMerger2      | 0.91            |
| wtdbg2           | HaploMerger2      | 0.92            |
| Canu             | purge_dups        | 0.89            |
| Flye             | purge_dups        | 0.89            |
| NextDenovo       | purge_dups        | 0.90            |
| Ra               | purge_dups        | 0.91            |
| Raven            | purge_dups        | 0.90            |
| Shasta           | purge_dups        | 0.90            |
| wtdbg2           | purge_dups        | 0.91            |
| Canu             | purge_haplotigs   | 0.86            |
| Flye             | purge_haplotigs   | 0.85            |
| NextDenovo       | purge_haplotigs   | 0.87            |
| Ra               | purge_haplotigs   | 0.88            |
| Raven            | purge_haplotigs   | 0.80            |
| Shasta           | purge_haplotigs   | 0.90            |
| wtdbg2           | purge_haplotigs   | 0.90            |

**Table S2.** Haploidy values computed by HapPy v0.1 for PacBio assemblies.

| <b>Assembler</b> | <b>Processing</b>               | <b>Haploidy</b> |
|------------------|---------------------------------|-----------------|
| Canu             | longest reads + purge_haplotigs | 0.87            |
| Flye             | longest reads + purge_haplotigs | 0.85            |
| NextDenovo       | longest reads + purge_haplotigs | 0.94            |
| Ra               | longest reads + purge_haplotigs | 0.92            |
| Raven            | longest reads + purge_haplotigs | 0.87            |
| Shasta           | longest reads + purge_haplotigs | 0.96            |
| wtdbg2           | longest reads + purge_haplotigs | 0.90            |
| Canu             | longest reads + purge_dups      | 0.91            |
| Flye             | longest reads + purge_dups      | 0.90            |
| NextDenovo       | longest reads + purge_dups      | 0.97            |
| Ra               | longest reads + purge_dups      | 0.95            |
| Raven            | longest reads + purge_dups      | 0.91            |
| Shasta           | longest reads + purge_dups      | 0.97            |
| wtdbg2           | longest reads + purge_dups      | 0.92            |
| Canu             | Filtlong + purge_haplotigs      | 0.56            |
| Flye             | Filtlong + purge_haplotigs      | 0.86            |
| NextDenovo       | Filtlong + purge_haplotigs      | 0.88            |
| Ra               | Filtlong + purge_haplotigs      | 0.93            |
| Raven            | Filtlong + purge_haplotigs      | 0.90            |
| Shasta           | Filtlong + purge_haplotigs      | 0.85            |
| wtdbg2           | Filtlong + purge_haplotigs      | 0.94            |
| Canu             | Filtlong + purge_dups           | 0.90            |
| Flye             | Filtlong + purge_dups           | 0.90            |
| NextDenovo       | Filtlong + purge_dups           | 0.93            |
| Ra               | Filtlong + purge_dups           | 0.94            |
| Raven            | Filtlong + purge_dups           | 0.92            |
| Shasta           | Filtlong + purge_dups           | 0.92            |
| wtdbg2           | Filtlong + purge_dups           | 0.91            |

**Table S3.** Haploidy values computed by HapPy v0.1 for PacBio assemblies.

| <b>Assembler</b> | <b>Processing</b>              | <b>Haploidy</b> |
|------------------|--------------------------------|-----------------|
| Canu             | HaploMerger2 + purge_haplotigs | 0.82            |
| Flye             | HaploMerger2 + purge_haplotigs | 0.89            |
| NextDenovo       | HaploMerger2 + purge_haplotigs | 0.88            |
| Ra               | HaploMerger2 + purge_haplotigs | 0.88            |
| Raven            | HaploMerger2 + purge_haplotigs | 0.83            |
| Shasta           | HaploMerger2 + purge_haplotigs | 0.88            |
| wtdbg2           | HaploMerger2 + purge_haplotigs | 0.84            |
| Canu             | purge_dups + HaploMerger2      | 0.91            |
| Flye             | purge_dups + HaploMerger2      | 0.90            |
| NextDenovo       | purge_dups + HaploMerger2      | 0.90            |
| Ra               | purge_dups + HaploMerger2      | 0.92            |
| Raven            | purge_dups + HaploMerger2      | 0.93            |
| Shasta           | purge_dups + HaploMerger2      | 0.92            |
| wtdbg2           | purge_dups + HaploMerger2      | 0.92            |
| Canu             | purge_dups + purge_haplotigs   | 0.88            |
| Flye             | purge_dups + purge_haplotigs   | 0.89            |
| NextDenovo       | purge_dups + purge_haplotigs   | 0.92            |
| Ra               | purge_dups + purge_haplotigs   | 0.89            |
| Raven            | purge_dups + purge_haplotigs   | 0.88            |
| Shasta           | purge_dups + purge_haplotigs   | 0.90            |
| wtdbg2           | purge_dups + purge_haplotigs   | 0.91            |

**Table S4.** Haploidy values computed by HapPy v0.1 for Nanopore assemblies.

| <b>Assembler</b> | <b>Processing</b> | <b>Haploidy</b> |
|------------------|-------------------|-----------------|
| Canu             | raw assemblies    | 0.63            |
| Flye             | raw assemblies    | 0.79            |
| NextDenovo       | raw assemblies    | 0.72            |
| Ra               | raw assemblies    | 0.90            |
| Raven            | raw assemblies    | 0.83            |
| Shasta           | raw assemblies    | 0.86            |
| wtdbg2           | raw assemblies    | 0.92            |
| Canu             | longest reads     | 0.59            |
| Flye             | longest reads     | 0.79            |
| NextDenovo       | longest reads     | 0.72            |
| Ra               | longest reads     | 0.95            |
| Raven            | longest reads     | 0.89            |
| Shasta           | longest reads     | 0.75            |
| wtdbg2           | longest reads     | 0.92            |
| Canu             | Filtlong          | 0.67            |
| Flye             | Filtlong          | 0.81            |
| NextDenovo       | Filtlong          | 0.77            |
| Ra               | Filtlong          | 0.97            |
| Raven            | Filtlong          | 0.92            |
| Shasta           | Filtlong          | 0.72            |
| wtdbg2           | Filtlong          | 0.87            |
| Canu             | HaploMerger2      | 0.89            |
| Flye             | HaploMerger2      | 0.87            |
| NextDenovo       | HaploMerger2      | 0.89            |
| Ra               | HaploMerger2      | 0.91            |
| Raven            | HaploMerger2      | 0.88            |
| Shasta           | HaploMerger2      | 0.90            |
| wtdbg2           | HaploMerger2      | 0.89            |
| Canu             | purge_dups        | 0.92            |
| Flye             | purge_dups        | 0.90            |
| NextDenovo       | purge_dups        | 0.92            |
| Ra               | purge_dups        | 0.93            |
| Raven            | purge_dups        | 0.90            |
| Shasta           | purge_dups        | 0.91            |
| wtdbg2           | purge_dups        | 0.93            |
| Canu             | purge_haplotigs   | 0.86            |
| Flye             | purge_haplotigs   | 0.79            |
| NextDenovo       | purge_haplotigs   | 0.90            |
| Ra               | purge_haplotigs   | 0.90            |
| Raven            | purge_haplotigs   | 0.83            |
| Shasta           | purge_haplotigs   | 0.86            |
| wtdbg2           | purge_haplotigs   | 0.91            |

**Table S5.** Haploidy values computed by HapPy v0.1 for Nanopore assemblies.

| <b>Assembler</b> | <b>Processing</b>               | <b>Haploidy</b> |
|------------------|---------------------------------|-----------------|
| Canu             | longest reads + purge_haplotigs | 0.85            |
| Flye             | longest reads + purge_haplotigs | 0.79            |
| NextDenovo       | longest reads + purge_haplotigs | 0.72            |
| Ra               | longest reads + purge_haplotigs | 0.95            |
| Raven            | longest reads + purge_haplotigs | 0.89            |
| Shasta           | longest reads + purge_haplotigs | 0.75            |
| wtdbg2           | longest reads + purge_haplotigs | 0.91            |
| Canu             | longest reads + purge_dups      | 0.89            |
| Flye             | longest reads + purge_dups      | 0.91            |
| NextDenovo       | longest reads + purge_dups      | 0.95            |
| Ra               | longest reads + purge_dups      | 0.96            |
| Raven            | longest reads + purge_dups      | 0.95            |
| Shasta           | longest reads + purge_dups      | 0.93            |
| wtdbg2           | longest reads + purge_dups      | 0.92            |
| Canu             | Filtlong + purge_haplotigs      | 0.90            |
| Flye             | Filtlong + purge_haplotigs      | 0.81            |
| NextDenovo       | Filtlong + purge_haplotigs      | 0.77            |
| Ra               | Filtlong + purge_haplotigs      | 0.97            |
| Raven            | Filtlong + purge_haplotigs      | 0.92            |
| Shasta           | Filtlong + purge_haplotigs      | 0.72            |
| wtdbg2           | Filtlong + purge_haplotigs      | 0.89            |
| Canu             | Filtlong + purge_dups           | 0.93            |
| Flye             | Filtlong + purge_dups           | 0.91            |
| NextDenovo       | Filtlong + purge_dups           | 0.94            |
| Ra               | Filtlong + purge_dups           | 0.97            |
| Raven            | Filtlong + purge_dups           | 0.96            |
| Shasta           | Filtlong + purge_dups           | 0.94            |
| wtdbg2           | Filtlong + purge_dups           | 0.91            |

**Table S6.** Haploidy values computed by HapPy v0.1 for Nanopore assemblies.

| <b>Assembler</b> | <b>Processing</b>              | <b>Haploidy</b> |
|------------------|--------------------------------|-----------------|
| Canu             | HaploMerger2 + purge_haplotigs | 0.89            |
| Flye             | HaploMerger2 + purge_haplotigs | 0.87            |
| NextDenovo       | HaploMerger2 + purge_haplotigs | 0.89            |
| Ra               | HaploMerger2 + purge_haplotigs | 0.91            |
| Raven            | HaploMerger2 + purge_haplotigs | 0.92            |
| Shasta           | HaploMerger2 + purge_haplotigs | 0.90            |
| wtdbg2           | HaploMerger2 + purge_haplotigs | 0.90            |
| Canu             | purge_dups + purge_haplotigs   | 0.91            |
| Flye             | purge_dups + purge_haplotigs   | 0.90            |
| NextDenovo       | purge_dups + purge_haplotigs   | 0.94            |
| Ra               | purge_dups + purge_haplotigs   | 0.93            |
| Raven            | purge_dups + purge_haplotigs   | 0.90            |
| Shasta           | purge_dups + purge_haplotigs   | 0.91            |
| wtdbg2           | purge_dups + purge_haplotigs   | 0.92            |
| Canu             | purge_dups + HaploMerger2      | 0.90            |
| Flye             | purge_dups + HaploMerger2      | 0.88            |
| NextDenovo       | purge_dups + HaploMerger2      | 0.90            |
| Ra               | purge_dups + HaploMerger2      | 0.91            |
| Raven            | purge_dups + HaploMerger2      | 0.51            |
| Shasta           | purge_dups + HaploMerger2      | 0.90            |
| wtdbg2           | purge_dups + HaploMerger2      | 0.89            |



**Table S7.** List of command lines used for each tool. Values L, M, H for `purge_haplotigs cov` were selected for each assembly according to the histogram produced by `purge_haplotigs hist`.

| Program         | Dataset  | Command lines                                                                                                                                                                                                                                                                                                                                                                                                                                         |
|-----------------|----------|-------------------------------------------------------------------------------------------------------------------------------------------------------------------------------------------------------------------------------------------------------------------------------------------------------------------------------------------------------------------------------------------------------------------------------------------------------|
| Filllong        | -        | <code>filllong --target_bases 4092000000 --mean_g_weight 10 long_read_data</code>                                                                                                                                                                                                                                                                                                                                                                     |
| Canu            | PacBio   | <code>canu -d out -p out genomeSize=100m useGrid=false -pacbio-raw pb_data</code>                                                                                                                                                                                                                                                                                                                                                                     |
| Canu            | Nanopore | <code>canu -d out -p out genomeSize=100m useGrid=false -nanopore-raw ont_data</code>                                                                                                                                                                                                                                                                                                                                                                  |
| Flye            | PacBio   | <code>flye -o out -g 100m --pacbio-raw pb_data</code>                                                                                                                                                                                                                                                                                                                                                                                                 |
| Flye            | Nanopore | <code>flye -o out -g 100m --nano-raw ont_data</code>                                                                                                                                                                                                                                                                                                                                                                                                  |
| NextDenovo      | PacBio   | <code>echo pb_data &gt; input.fofn<br/>seq_stat input.fofn -g 100Mb -d 150 &gt; stats.txt<br/>NextDenovo run.cfg</code>                                                                                                                                                                                                                                                                                                                               |
| NextDenovo      | Nanopore | <code>echo ont_data &gt; input.fofn<br/>seq_stat input.fofn -g 100Mb -d 150 &gt; stats.txt<br/>NextDenovo run.cfg</code>                                                                                                                                                                                                                                                                                                                              |
| Ra              | PacBio   | <code>ra -x pb pb_data &gt; assembly.fasta</code>                                                                                                                                                                                                                                                                                                                                                                                                     |
| Ra              | Nanopore | <code>ra -x ont ont_data &gt; assembly.fasta</code>                                                                                                                                                                                                                                                                                                                                                                                                   |
| Raven           | -        | <code>raven long_read_data &gt; assembly.fasta</code>                                                                                                                                                                                                                                                                                                                                                                                                 |
| Shasta          | PacBio   | <code>shasta --input pb_data --Reads.minReadLength 0 --assemblyDirectory out --Assembly.consensusCaller Modal --Kmers.k 12</code>                                                                                                                                                                                                                                                                                                                     |
| Shasta          | Nanopore | <code>shasta --input ont_data --Reads.minReadLength 0 --assemblyDirectory out</code>                                                                                                                                                                                                                                                                                                                                                                  |
| wtdbg2          | PacBio   | <code>wtdbg2 -x rs -g 100m -i pb_data -fo out<br/>wtpoa-cns -i out.ctg.lay.gz -o out.ctg.fa<br/>minimap2 -x map-pb -a out.ctg.fa pb_data   samtools sort &gt; out.ctg.bam<br/>samtools view out.ctg.bam   wtpoa-cns -d out.ctg.fa -i - -fo assembly.fasta</code>                                                                                                                                                                                      |
| wtdbg2          | Nanopore | <code>wtdbg2 -x ont -g 100m -i ont_data -fo out<br/>wtpoa-cns -i out.ctg.lay.gz -o out.ctg.fa<br/>minimap2 -x map-ont -a out.ctg.fa ont_data   samtools sort &gt; out.ctg.bam<br/>samtools view out.ctg.bam   wtpoa-cns -d out.ctg.fa -i - -fo assembly.fasta</code>                                                                                                                                                                                  |
| HaploMerger2    | -        | <code>samtools faidx assembly.fasta<br/>BuildDatabase -name asm.db -engine ncbi assembly.fasta<br/>RepeatModeler -engine ncbi -database asm.db<br/>RepeatMasker -e ncbi -lib consensi.fa -xsmall assembly.fasta<br/>run_all.batch</code>                                                                                                                                                                                                              |
| purge_dups      | PacBio   | <code>echo pb_data &gt; input.fofn<br/>pd_config.py assembly.fasta input.fofn<br/>run_purge_dups.py config.json purge_dups_bin species_id</code>                                                                                                                                                                                                                                                                                                      |
| purge_dups      | Nanopore | <code>echo ont_data &gt; input.fofn<br/>pd_config.py assembly.fasta input.fofn<br/>run_purge_dups.py config.json purge_dups_bin species_id</code>                                                                                                                                                                                                                                                                                                     |
| purge_haplotigs | PacBio   | <code>minimap2 -ax map-pb assembly.fasta ont_data --secondary=no &gt; aligned.bam<br/>samtools sort -o ali.sorted.bam -T tmp.ali aligned.bam<br/>samtools index ali.sorted.bam<br/>samtools faidx assembly.fasta<br/>purge_haplotigs hist -b ali.sorted.bam -g assembly.fasta<br/>purge_haplotigs cov -i ali.sorted.bam -l L -m M -h H -o cov_stats.csv<br/>purge_haplotigs purge -g assembly.fasta -c cov_stats.csv -o assembly.purged.fasta</code>  |
| purge_haplotigs | Nanopore | <code>minimap2 -ax map-ont assembly.fasta ont_data --secondary=no &gt; aligned.bam<br/>samtools sort -o ali.sorted.bam -T tmp.ali aligned.bam<br/>samtools index ali.sorted.bam<br/>samtools faidx assembly.fasta<br/>purge_haplotigs hist -b ali.sorted.bam -g assembly.fasta<br/>purge_haplotigs cov -i ali.sorted.bam -l L -m M -h H -o cov_stats.csv<br/>purge_haplotigs purge -g assembly.fasta -c cov_stats.csv -o assembly.purged.fasta</code> |
| BBtools         | -        | <code>reformat.sh in=long_reads_data out=subset_data samplebasestarget=number_of_bases</code>                                                                                                                                                                                                                                                                                                                                                         |
| BUSCO           | -        | <code>busco -i assembly.fasta -o busco_output -l metazoa_odb10 -m genome</code>                                                                                                                                                                                                                                                                                                                                                                       |
| KAT             | Illumina | <code>kat comp -o kat_output 'end1.fastq end2.fastq' assembly.fasta</code>                                                                                                                                                                                                                                                                                                                                                                            |
| tinycov         | Nanopore | <code>minimap2 -x map-ont -a assembly.fasta ont_data   samtools sort &gt; aligned.bam<br/>tinycov covplot -r 20000 -t cov.txt aligned.bam</code>                                                                                                                                                                                                                                                                                                      |
| tinycov         | PacBio   | <code>minimap2 -x map-pb -a assembly.fasta pb_data   samtools sort &gt; aligned.bam<br/>tinycov covplot -r 20000 -t cov.txt aligned.bam</code>                                                                                                                                                                                                                                                                                                        |
| HapPy           | Nanopore | <code>minimap2 -x map-ont -a assembly.fasta ont_data   samtools sort &gt; aligned.bam<br/>HapPy.py depth aligned.bam out_dir<br/>HapPy.py estimate out_dir/aligned.bam.hist</code>                                                                                                                                                                                                                                                                    |
| HapPy           | PacBio   | <code>minimap2 -x map-pb -a assembly.fasta pb_data   samtools sort &gt; aligned.bam<br/>HapPy.py depth aligned.bam out_dir<br/>HapPy.py estimate out_dir/aligned.bam.hist</code>                                                                                                                                                                                                                                                                      |
| time            | -        | <code>/usr/bin/time -v -o time_output.txt</code>                                                                                                                                                                                                                                                                                                                                                                                                      |

**Table S8.** Long-read and short-read datasets used in the study.

| Data type         | Minimum length | Total data | N50     |
|-------------------|----------------|------------|---------|
| PacBio            | -              | 23.5 Gb    | 11.6 kb |
|                   | 15 kb          | 4.7 Gb     | 17.6 kb |
| Nanopore          | -              | 17.5 Gb    | 18.8 kb |
|                   | 30 kb          | 5.7 Gb     | 51.8 kb |
| Illumina 2*250 bp | 30 bp          | 11.4 Gb    | 250 bp  |
